# Supplementary material for: Chiral N-heterocyclic carbene catalyzed annulation of α,β-unsaturated aldehydes with 1,3-dicarbonyls
Source: Royal Society of Chemistry journal article supplement (doi:10.1039/c1cc12778k), 2011-01-01

*Supporting Information for*

**Chiral *N*-Heterocyclic Carbene Catalyzed Enantioselective  
Annulation of  $\alpha,\beta$ -Unsaturated Aldehydes with 1,3-Dicarbonyls**

**Zhi-Qiang Zhu,<sup>a</sup> Xing-Liang Zheng,<sup>b</sup> Ning-Fei Jiang,<sup>b</sup> Xiaolong Wan<sup>a</sup> and  
Ji-Chang Xiao<sup>\*a</sup>**

*Key Laboratory of Organofluorine Chemistry, Shanghai Institute of Organic Chemistry, Chinese Academy of Sciences, 345 Lingling Road, Shanghai 200032, China, and School of Chemistry and Biological Engineering, Changsha University of Science and Technology, Changsha 410114, China.*

*E-mail: jchxiao@mail.sioc.ac.cn*

Table of Contents

|                                                                                                                                |         |
|--------------------------------------------------------------------------------------------------------------------------------|---------|
| 1. General Methods.....                                                                                                        | S2      |
| 2. General procedure.....                                                                                                      | S2      |
| 3. Optimization of the Reaction Conditions for NHC-Catalyzed<br>Enantioselective Annulation of Enals with 1,3-Dicarbonyls..... | S3      |
| 4. Characterizations of the Products <b>3a-y</b> .....                                                                         | S4-S13  |
| 5. HPLC Analysis of the Products <b>3a-y</b> .....                                                                             | S14-S26 |
| 6. NMR Spectra for Available Products.....                                                                                     | S27-S47 |

**General Methods.** All reactions were carried out under nitrogen atmosphere. All the reagents used were purchased from commercial sources and used without further purification. THF and toluene were freshly distilled from sodium wire.  $^1\text{H}$ ,  $^{13}\text{C}$  NMR spectra were recorded in  $\text{CDCl}_3$  on a spectrometer operating at 300 and 100 MHz, respectively. Chemical shifts are reported in parts per million relative to the appropriate standard: TMS for  $^1\text{H}$  and  $^{13}\text{C}$  NMR spectra. High Resolution Mass spectra were recorded on a Waters Micromass GCT instrument. The IR spectra were recorded on a Shimadzu IR-440 spectrometer. Column chromatography was carried out on silica gel (300-400  $\mu\text{m}$ ).

### **General Procedure for Chiral *N*-Heterocyclic Carbene Catalyzed Enantioselective Annulation of Ynals with 1,3-Dicarbonyls ( G1)**

Into an oven dried 10 mL vial was weighed catalyst **C3** (7.4 mg, 0.02 mmol) and 4 Å MS (200 mg). Followed by the addition of a solution of ynal (0.3 mmol), 1,3-dicarbonyl (0.2 mmol) in toluene (2 mL). After stirring at 40 °C for 8 h, the reaction mixture was filtrated, and the solvent was evaporated under reduced pressure at room temperature to afford a residue. Further purification by flash column chromatography on silica gel gave the final product (Hexane : EtOAc = 10 : 1 to 8:1).

### **General Procedure for Chiral *N*-Heterocyclic Carbene Catalyzed Enantioselective Annulation of Enals with 1,3-Dicarbonyls ( G2)**

Into an oven dried 10 mL vial was weighed catalyst **C3** (11 mg, 0.03 mmol), oxidant (122.6 mg, 0.3 mmol) and 4 Å MS (300 mg). Followed by the addition of a solution of enal (0.45 mmol), 1,3-dicarbonyl (0.3 mmol) in toluene (3 mL). After stirring at 40 °C for indicated time, the reaction mixture was filtrated, and the solvent was evaporated under reduced pressure at room temperature to afford a residue. Further purification by flash column chromatography on silica gel to give the product (Hexane : EtOAc = 10 : 1 to 8:1).

**Table 1. Optimization of Reaction Conditions for Chiral NHC-Catalyzed Enantioselective Annulation of Enals with 1,3-Dicarbonyls<sup>a</sup>**

| Entry             | Conditions                             | Yield <sup>b</sup> (%) | Ee <sup>c</sup> (%) |
|-------------------|----------------------------------------|------------------------|---------------------|
| 1                 | A, DBU, THF, rt, 2 h                   | 79                     | -4                  |
| 2                 | B, DBU, THF, rt, 5 h                   | —                      | —                   |
| 3                 | C1, DBU, THF, rt, 5 h                  | 80                     | 14                  |
| 4                 | C2, DBU, THF, rt, 5 h                  | —                      | —                   |
| 5                 | C3, DBU, THF, rt, 5 min                | 83                     | 67                  |
| 6                 | C3, DBU, THF, 0 °C, 5 min              | 85                     | 71                  |
| 7                 | C3, NaH, THF, 0 °C, 5min               | 78                     | 83                  |
| 8                 | C3, <i>t</i> -BuOK, THF, 0 °C, 5min    | 78                     | 71                  |
| 9                 | C3, NaH, THF, -20 °C, 30min,           | 81                     | 80                  |
| 10                | C3, NaH, Et <sub>2</sub> O, 0 °C, 5min | 79                     | 83                  |
| 11                | C3, NaH, toluene, 0 °C, 48 h           | 44                     | 89                  |
| 12 <sup>d,e</sup> | C3, 4Å MS, toluene, 40 °C, 10 h        | 83                     | 98                  |
| 13 <sup>d,f</sup> | C3, toluene, 40 °C, 10 h               | 33                     | 85                  |

<sup>a</sup> Performed on a 0.3 mmol scale in 3 ml solvent with 10 mol% of catalyst, 10 mol % of base, 1 equiv of **4a**, 1.5 equiv of **2a**, 1 equiv of [O]. <sup>b</sup> Isolated yield after chromatography. <sup>c</sup> Determined by HPLC analysis on a chiral column. <sup>d</sup> 1.5 equiv of **4a** and 1 equiv of **2a** were used. <sup>e</sup> 300 mg 4 Å MS was added instead of 10 mol% of base. <sup>f</sup> No base was used.

(*R*)-Ethyl 6-methyl-2-oxo-4-phenyl-3,4-dihydro-2H-pyran-5-carboxylate (**3a**)

According to **G1**: 81% yield, 98% ee (PA-2 column, *n*-hexane/*i*-PrOH = 98/2, flow rate 0.7 mL/min,  $\lambda = 214$  nm,  $t_{\text{major}} = 20.6$  min,  $t_{\text{minor}} = 24.6$  min),  $[\alpha]_{\text{D}}^{20} = -167.2^{\circ}$  ( $c = 1$ , CHCl<sub>3</sub>). According to **G2** for 10 h: 83% yield, 98% ee. <sup>1</sup>H NMR (300 MHz, CDCl<sub>3</sub>)  $\delta$  7.35-7.09 (m, 5H), 4.26 (d,  $J = 7.3$  Hz, 1 H), 4.12 (q,  $J = 7.3$  Hz, 2 H), 2.95 (dd,  $J = 16.0, 7.3$  Hz, 1 H), 2.81 (d,  $J = 16.0$  Hz, 1 H), 2.47 (s, 3 H), 1.18 (t,  $J = 7.3$  Hz, 3 H).

(*R*)-Ethyl 4-(4-methoxyphenyl)-6-methyl-2-oxo-3,4-dihydro-2H-pyran-5-carboxylate (**3b**)

According to **G1**: 67% yield, 92% ee (Sino-OD column, *n*-hexane/*i*-PrOH = 9/1, flow rate 0.7 mL/min,  $\lambda = 214$  nm,  $t_{\text{minor}} = 12.2$  min,  $t_{\text{major}} = 16.2$  min),  $[\alpha]_{\text{D}}^{20} = -124.0^{\circ}$  ( $c = 1$ , CHCl<sub>3</sub>). According to **G2**, except that 1 equiv of ynal and 1.5 equiv of 3-oxobutanoate were used and the reaction was performed at room temperature for 66 h: 73% yield, 91% ee. <sup>1</sup>H NMR (300 MHz, CDCl<sub>3</sub>)  $\delta$  7.06 (d,  $J = 8.7$  Hz, 2 H), 6.82 (d,  $J = 8.7$  Hz, 2 H), 4.21 (d,  $J = 7.3$  Hz, 1 H), 4.13 (q,  $J = 7.0$  Hz, 2 H), 3.76 (s, 3H), 2.92 (dd,  $J = 16.0, 7.3$  Hz, 1 H), 2.78 (d,  $J = 16.0$  Hz, 1 H), 2.46 (s, 3 H), 1.20 (t,  $J = 7.0$  Hz, 3 H).

(*R*)-Ethyl 6-methyl-2-oxo-4-(*p*-tolyl)-3,4-dihydro-2H-pyran-5-carboxylate (**3c**)

According to **G1**: 82% yield, 97% ee (PA-2 column, *n*-hexane/*i*-PrOH = 98/2, flow rate 0.7 mL/min,  $\lambda = 214$  nm,  $t_{\text{major}} = 20.5$  min,  $t_{\text{minor}} = 26.4$  min),  $[\alpha]_{\text{D}}^{20} = -145.4^{\circ}$  ( $c = 1$ , CHCl<sub>3</sub>). According to **G2** for 24 h: 77% yield, 92% ee. <sup>1</sup>H NMR (300 MHz, CDCl<sub>3</sub>)  $\delta$  7.09 (d,  $J = 7.7$  Hz, 2 H), 7.02 (d,  $J = 7.7$  Hz, 2 H), 4.22 (d,  $J = 7.5$  Hz, 1 H), 4.12 (q,  $J = 7.1$  Hz, 2 H), 2.92 (dd,  $J = 16.0, 7.5$  Hz, 1 H), 2.79 (d,  $J = 16.0$  Hz, 1 H), 2.46 (s, 3

H), 2.29 (s, 3 H), 1.19 (t,  $J = 7.1$  Hz, 3 H).

(*R*)-Ethyl 6-methyl-2-oxo-4-(*m*-tolyl)-3,4-dihydro-2H-pyran-5-carboxylate (**3d**)

According to **G1**: 87% yield, 95% ee. According to **G2** for 16 h: 87% yield, 97% ee (PA-2 column, *n*-hexane/*i*-PrOH = 98/2, flow rate 0.7 mL/min,  $\lambda = 214$  nm,  $t_{\text{major}} = 18.3$  min,  $t_{\text{minor}} = 22.0$  min),  $[\alpha]_{\text{D}}^{20} = -160.7^\circ$  ( $c = 1$ , CHCl<sub>3</sub>), <sup>1</sup>H NMR (300 MHz, CDCl<sub>3</sub>)  $\delta$  7.23-6.87 (m, 4 H), 4.22 (d,  $J = 7.3$  Hz, 1 H), 4.13 (q,  $J = 7.1$  Hz, 2 H), 2.94 (dd,  $J = 16.0, 7.5$  Hz, 1 H), 2.80 (dd,  $J = 16.0, 2.1$  Hz, 1 H), 2.48 (s, 3 H), 2.31 (s, 3 H), 1.20 (t,  $J = 7.1$  Hz, 3 H); <sup>13</sup>C NMR (101 MHz, CDCl<sub>3</sub>)  $\delta$  166.2, 166.0, 161.2, 140.7, 138.7, 128.9, 128.3, 127.3, 123.7, 110.1, 60.8, 37.8, 36.4, 21.5, 18.9, 14.1; IR (film):  $\nu = 2985, 2923, 2853, 1797, 1713, 1642, 1514, 1446, 1417, 1380, 1344, 1291, 1242, 1173, 1067, 1030, 965, 865, 816, 785, 733, 665, 593, 552, 507$  cm<sup>-1</sup>; HRMS (EI,  $m/z$ ): calcd for [M]<sup>+</sup>, 274.1205; found, 274.1202.

(*R*)-Ethyl 6-methyl-2-oxo-4-(*o*-tolyl)-3,4-dihydro-2H-pyran-5-carboxylate (**3e**)

According to **G1**: 77% yield, 96% ee. According to **G2** for 18 h: 81% yield, 97% ee (PA-2 column, *n*-hexane/*i*-PrOH = 98/2, flow rate 0.7 mL/min,  $\lambda = 214$  nm,  $t_{\text{major}} = 25.6$  min,  $t_{\text{minor}} = 31.2$  min),  $[\alpha]_{\text{D}}^{20} = -175.8^\circ$  ( $c = 1$ , CHCl<sub>3</sub>), <sup>1</sup>H NMR (300 MHz, CDCl<sub>3</sub>)  $\delta$  7.21-6.90 (m, 4 H), 4.50 (d,  $J = 7.9$  Hz, 1 H), 4.18-3.98 (m, 2 H), 2.92 (dd,  $J = 15.6, 7.9$  Hz, 1 H), 2.66 (dd,  $J = 15.6, 2.0$  Hz, 1 H), 2.51 (s, 3 H), 2.38 (s, 3 H), 1.14 (t,  $J = 7.1$  Hz, 3 H); <sup>13</sup>C NMR (101 MHz, CDCl<sub>3</sub>)  $\delta$  166.0, 165.9, 161.7, 138.4, 134.9, 131.0, 127.5, 126.8, 125.3, 110.1, 60.8, 35.3, 34.0, 19.2, 18.8, 14.0; IR (KBr):  $\nu = 3000, 2955, 1787, 1715, 1644, 1594, 1509, 1459, 1415, 1370, 1288, 1275, 1242, 1222, 1175, 1128, 1068, 835, 789, 734$  cm<sup>-1</sup>; HRMS (EI,  $m/z$ ): calcd for [M]<sup>+</sup>, 274.1205; found, 274.1207.

(*R*)-Ethyl 4-(4-fluorophenyl)-6-methyl-2-oxo-3,4-dihydro-2H-pyran-5-carboxylate  
(**3f**)

According to **G1**: 66% yield, 96% ee (PA-2 column, *n*-hexane/*i*-PrOH = 98/2, flow rate 0.7 mL/min,  $\lambda = 214$  nm,  $t_{\text{major}} = 22.3$  min,  $t_{\text{minor}} = 27.8$  min),  $[\alpha]_{\text{D}}^{20} = -99.0^{\circ}$  ( $c = 1$ , CHCl<sub>3</sub>). According to **G2**, except that the reaction was performed at room temperature for 48 h: 74% yield, 92% ee. <sup>1</sup>H NMR (300 MHz, CDCl<sub>3</sub>)  $\delta$  7.16-6.91 (m, 4 H), 4.25 (d,  $J = 7.3$  Hz, 1 H), 4.14 (q,  $J = 7.1$  Hz, 2 H), 2.95 (dd,  $J = 16.0, 7.3$  Hz, 1 H), 2.79 (d,  $J = 16.0$  Hz, 1 H), 2.47 (s, 3 H), 1.20 (t,  $J = 7.1$  Hz, 3 H).

(*S*)-Ethyl 4-(2-fluorophenyl)-6-methyl-2-oxo-3,4-dihydro-2H-pyran-5-carboxylate  
(**3g**)

According to **G1**, except that 1 equiv of ynal and 1.5 equiv of 3-oxobutanoate were used: 74% yield, 92% ee. According to **G2** for 12 h: 85% yield, 97% ee (OD-H column, *n*-hexane/*i*-PrOH = 9/1, flow rate 0.7 mL/min,  $\lambda = 214$  nm,  $t_{\text{minor}} = 10.0$  min,  $t_{\text{major}} = 12.4$  min),  $[\alpha]_{\text{D}}^{20} = -151.7^{\circ}$  ( $c = 1$ , CHCl<sub>3</sub>), <sup>1</sup>H NMR (300 MHz, CDCl<sub>3</sub>)  $\delta$  7.29-6.95 (m, 4 H), 4.59 (d,  $J = 7.5$  Hz, 1 H), 4.22-4.03 (m, 2 H), 2.95 (dd,  $J = 16.0, 7.5$  Hz, 1 H), 2.84 (dd,  $J = 16.0, 2.3$  Hz, 1 H), 2.51 (s, 3 H), 1.17 (t,  $J = 7.1$  Hz, 3 H); <sup>19</sup>F NMR (282 MHz, CDCl<sub>3</sub>)  $\delta$  -118.09-118.23 (m, 1 F); <sup>13</sup>C NMR (101 MHz, CDCl<sub>3</sub>)  $\delta$  165.7, 165.6, 162.3, 161.6, 159.1, 129.3, 129.2, 127.80, 127.76, 127.4, 127.2, 124.55, 124.52, 115.9, 115.7, 108.4, 60.8, 35.0, 31.48, 31.45, 29.7, 18.8, 14.0; IR (KBr):  $\nu = 3000, 2955, 1787, 1715, 1644, 1594, 1509, 1459, 1415, 1370, 1288, 1275, 1242, 1222, 1175, 1128, 1068, 835, 789, 734$  cm<sup>-1</sup>; HRMS (EI, *m/z*): calcd for [M]<sup>+</sup>, 278.0954; found, 278.0956.

(*R*)-Ethyl 4-(4-chlorophenyl)-2-oxo-6-phenyl-3,4-dihydro-2H-pyran-5-carboxylate  
(**3h**)

According to **G1**, except that the reaction was performed at room temperature for 48 h: 49% yield, 94% ee. According to **G2** for 12 h: 73% yield, 95% ee (OD-H column, *n*-hexane/*i*-PrOH = 7/3, flow rate 0.7 mL/min,  $\lambda = 214$  nm,  $t_{\text{minor}} = 8.6$  min,  $t_{\text{major}} = 15.6$  min),  $[\alpha]_{\text{D}}^{20} = -164.0^{\circ}$  ( $c = 1$ , CHCl<sub>3</sub>), <sup>1</sup>H NMR (300 MHz, CDCl<sub>3</sub>)  $\delta$  7.27 (d,  $J = 8.5$  Hz, 2 H), 7.08 (d,  $J = 8.5$  Hz, 2 H), 4.24 (d,  $J = 7.6$  Hz, 1 H), 4.14 (q,  $J = 7.1$  Hz, 2 H), 2.95 (dd,  $J = 15.8, 7.6$  Hz, 1 H), 2.79 (dd,  $J = 15.8, 2.1$  Hz, 1 H), 2.48 (s, 3 H), 1.20 (t,  $J = 7.1$  Hz, 3 H); <sup>13</sup>C NMR (101 MHz, CDCl<sub>3</sub>)  $\delta$  165.8, 161.7, 139.2, 133.4, 129.2, 128.1, 109.7, 61.0, 37.4, 36.2, 18.9, 14.1; IR (KBr):  $\nu = 2982, 2927, 1789, 1714, 1649, 1492, 1412, 1370, 1287, 1243, 1174, 1117, 1075, 1031, 1015, 967, 825, 793, 672, 534$  cm<sup>-1</sup>; HRMS (EI, *m/z*): calcd for [M]<sup>+</sup>, 294.0659; found, 294.0664.

(*R*)-Ethyl 4-(4-bromophenyl)-6-methyl-2-oxo-3,4-dihydro-2H-pyran-5-carboxylate  
**(3i)**

According to **G1**: 34% yield, 96% ee. According to **G2** for 12 h: 77% yield, 97% ee (OD-H column, *n*-hexane/*i*-PrOH = 7/3, flow rate 0.7 mL/min,  $\lambda = 214$  nm,  $t_{\text{minor}} = 8.3$  min,  $t_{\text{major}} = 15.7$  min),  $[\alpha]_{\text{D}}^{20} = -146.8^{\circ}$  ( $c = 1$ , CHCl<sub>3</sub>), <sup>1</sup>H NMR (300 MHz, CDCl<sub>3</sub>)  $\delta$  7.42 (d,  $J = 8.7$  Hz, 2 H), 7.02 (d,  $J = 8.7$  Hz, 2 H), 4.22 (d,  $J = 7.5$  Hz, 1 H), 4.14 (q,  $J = 7.1$  Hz, 2 H), 2.95 (dd,  $J = 15.9, 7.5$  Hz, 1 H), 2.78 (d,  $J = 15.9$  Hz, 1 H), 2.48 (s, 3 H), 1.20 (t,  $J = 7.1$  Hz, 3 H).

(*R*)-Ethyl 6-methyl-4-(naphthalen-1-yl)-2-oxo-3,4-dihydro-2H-pyran-5-carboxylate  
**(3j)**

According to **G1**: 81% yield, 92% ee (PA-2 column, *n*-hexane/*i*-PrOH = 7/3, flow rate 0.7 mL/min,  $\lambda = 214$  nm,  $t_{\text{major}} = 10.4$  min,  $t_{\text{minor}} = 12.0$  min),  $[\alpha]_{\text{D}}^{20} = -83.8^{\circ}$  ( $c = 1$ , CHCl<sub>3</sub>), <sup>1</sup>H NMR (300 MHz, CDCl<sub>3</sub>)  $\delta$  8.04 (d,  $J = 7.8$  Hz, 1 H), 7.89 (d,  $J = 7.8$  Hz, 1 H), 7.76 (d,  $J = 8.2$  Hz, 1 H), 7.63-7.46 (m, 2 H), 7.37 (t,  $J = 7.8$  Hz, 1 H), 7.18 (d,  $J = 7.3$  Hz, 1 H), 5.15 (d,  $J = 7.3$  Hz, 1 H), 4.17-3.95 (m, 2 H), 3.07 (dd,  $J = 15.5, 7.3$  Hz, 1 H), 2.95 (d,  $J = 15.5$  Hz, 1 H), 2.58 (s, 3 H), 1.05 (t,  $J = 7.1$  Hz, 3 H).

(*S*)-Ethyl 6-methyl-2-oxo-4-(thiophen-2-yl)-3,4-dihydro-2H-pyran-5-carboxylate (**3k**)

According to **G1**: 71% yield, 94% ee. According to **G2** for 16 h: 84% yield, 97% ee (OJ-H column, *n*-hexane/*i*-PrOH = 9/1, flow rate 0.7 mL/min,  $\lambda = 214$  nm,  $t_{\text{major}} = 35.4$  min,  $t_{\text{minor}} = 64.2$  min),  $[\alpha]_{\text{D}}^{20} = -118.8^{\circ}$  ( $c = 1$ , CHCl<sub>3</sub>), <sup>1</sup>H NMR (300 MHz, CDCl<sub>3</sub>)  $\delta$  7.16 (d,  $J = 5.0$  Hz, 1 H), 6.94-6.87 (m, 1 H), 6.85-6.80 (m, 1 H), 4.53 (d,  $J = 7.2$  Hz, 1 H), 4.23 (q,  $J = 7.1$  Hz, 2 H), 3.06-2.87 (m, 2 H), 2.43 (s, 3 H), 1.28 (t,  $J = 7.1$  Hz, 3 H).

(*S*)-Ethyl 4-butyl-6-methyl-2-oxo-3,4-dihydro-2H-pyran-5-carboxylate (**3l**)

According to **G1**, except that the reaction was performed at room temperature for 48 h: 68% yield, 85% ee (PA-2 column, *n*-hexane/*i*-PrOH = 9/1, flow rate 0.7 mL/min,  $\lambda = 214$  nm,  $t_{\text{minor}} = 7.8$  min,  $t_{\text{major}} = 11.0$  min),  $[\alpha]_{\text{D}}^{20} = -8.0^{\circ}$  ( $c = 1$ , CHCl<sub>3</sub>), <sup>1</sup>H NMR (300 MHz, CDCl<sub>3</sub>)  $\delta$  4.32-4.15 (m, 2 H), 3.01-2.91 (m, 1 H), 2.70 (dd,  $J = 16.0, 1.8$  Hz, 2 H), 2.58 (dd,  $J = 16.0, 6.6$  Hz, 1 H), 2.34 (s, 3 H), 1.56-1.16 (m, 9 H), 0.88 (t,  $J = 6.7$  Hz, 3 H); <sup>13</sup>C NMR (101 MHz, CDCl<sub>3</sub>)  $\delta$  167.3, 166.4, 160.2, 111.8, 60.7, 33.10, 33.07, 31.6, 28.5, 22.4, 18.8, 14.2, 13.8; IR (film):  $\nu = 3000, 2955, 1787, 1715, 1644, 1594, 1509, 1459, 1415, 1370, 1288, 1275, 1242, 1222, 1175, 1128, 1068, 835, 789, 734$  cm<sup>-1</sup>; HRMS (EI, *m/z*): calcd for [M]<sup>+</sup>, 240.1362; found, 240.1366.

(*R*)-Ethyl 4-cyclohexyl-6-methyl-2-oxo-3,4-dihydro-2H-pyran-5-carboxylate (**3m**)

According to **G1**, except that the reaction was performed at room temperature for 48 h: 52% yield, 85% ee (PC-2 column, *n*-hexane/*i*-PrOH = 7/3, flow rate 0.7 mL/min,  $\lambda = 214$  nm,  $t_{\text{minor}} = 6.2$  min,  $t_{\text{major}} = 6.6$  min),  $[\alpha]_{\text{D}}^{20} = -11.1^{\circ}$  ( $c = 1$ , CHCl<sub>3</sub>), <sup>1</sup>H NMR (300 MHz, CDCl<sub>3</sub>)  $\delta$  4.36-4.12 (m, 2 H), 2.91-2.83 (m, 1 H), 2.78 (d,  $J = 16.5$  Hz, 1 H),



2.51 (dd,  $J = 16.5, 7.4$  Hz, 1 H), 2.34 (s, 3 H), 1.79-0.79 (m, 14 H);  $^{13}\text{C}$  NMR (101 MHz,  $\text{CDCl}_3$ )  $\delta$  167.9, 166.7, 160.0, 110.6, 60.7, 41.4, 37.1, 30.8, 30.4, 29.0, 26.3, 26.2, 26.1, 18.8, 14.2; IR (KBr):  $\nu = 3000, 2955, 1787, 1715, 1644, 1594, 1509, 1459, 1415, 1370, 1288, 1275, 1242, 1222, 1175, 1128, 1068, 835, 789, 734$   $\text{cm}^{-1}$ ; HRMS (EI,  $m/z$ ): calcd for  $[\text{M}]^+$ , 266.1518; found, 266.1521.

(*R*)-Methyl 6-methyl-2-oxo-4-phenyl-3,4-dihydro-2H-pyran-5-carboxylate (**3n**)

According to **G1**: 71% yield, 95% ee (Sino-AD column, *n*-hexane/*i*-PrOH = 98/2, flow rate 0.5 mL/min,  $\lambda = 214$  nm,  $t_{\text{major}} = 15.9$  min,  $t_{\text{minor}} = 17.2$  min),  $[\alpha]_{\text{D}}^{20} = -135.0^\circ$  ( $c = 1$ ,  $\text{CHCl}_3$ ). According to **G2** for 12 h: 67% yield, 94% ee.  $^1\text{H}$  NMR (300 MHz,  $\text{CDCl}_3$ )  $\delta$  7.35-7.09 (m, 5 H), 4.26 (d,  $J = 7.3$  Hz, 1 H), 3.67 (s, 3 H), 2.94 (dd,  $J = 15.9, 7.3$  Hz, 1 H), 2.82 (d,  $J = 15.9$  Hz, 1 H), 2.48 (s, 3 H).

(*R*)-5-Acetyl-6-methyl-4-phenyl-3,4-dihydro-2H-pyran-2-one (**3o**)

According to **G1**: 46% yield, 95% ee (Sino-OD column, *n*-hexane/*i*-PrOH = 9/1, flow rate 0.7 mL/min,  $\lambda = 214$  nm,  $t_{\text{minor}} = 18.4$  min,  $t_{\text{major}} = 22.8$  min),  $[\alpha]_{\text{D}}^{20} = -138.0^\circ$  ( $c = 1$ ,  $\text{CHCl}_3$ ). According to **G2** for 22 h: 58% yield, 95% ee.  $^1\text{H}$  NMR (300 MHz,  $\text{CDCl}_3$ )  $\delta$  7.31-7.03 (m, 5 H), 4.08 (d,  $J = 7.1$  Hz, 1 H), 2.90 (dd,  $J = 15.7, 7.1$  Hz, 1 H), 2.76 (dd,  $J = 15.7, 2.6$  Hz, 1 H), 2.36 (s, 3 H), 2.05 (s, 3 H).

(*R*)-5-Benzoyl-6-methyl-4-phenyl-3,4-dihydro-2H-pyran-2-one (**3p**)

According to **G1**, except that the reaction was performed at room temperature for 48 h. 60% yield, 96% ee (PA-2 column, *n*-hexane/*i*-PrOH = 7/3, flow rate 0.7 mL/min,  $\lambda = 214$  nm,  $t_{\text{major}} = 17.9$  min,  $t_{\text{minor}} = 31.5$  min),  $[\alpha]_{\text{D}}^{20} = -26.7^\circ$  ( $c = 1$ ,  $\text{CHCl}_3$ ). According to **G2** for 24 h: 62% yield, 90% ee.  $^1\text{H}$  NMR (300 MHz,  $\text{CDCl}_3$ )  $\delta$  7.73-7.07 (m, 10 H), 4.32 (brs, 1 H), 3.07 (dd,  $J = 15.8, 7.0$  Hz, 1 H), 2.92 (dd,  $J = 15.8, 3.4$  Hz, 1 H),

1.89 (s, 3 H).

(*R*)-Ethyl 4-(4-cyanophenyl)-6-methyl-2-oxo-3,4-dihydro-2H-pyran-5-carboxylate  
(**3q**)

According to **G2** for 12 h: 37% yield, 96% ee (OD-H column, *n*-hexane/*i*-PrOH = 5/5, flow rate 0.7 mL/min,  $\lambda = 214$  nm,  $t_{\text{minor}} = 9.9$  min,  $t_{\text{major}} = 20.4$  min),  $[\alpha]_{\text{D}}^{20} = -189.0^{\circ}$  ( $c = 1$ , CHCl<sub>3</sub>), <sup>1</sup>H NMR (300 MHz, CDCl<sub>3</sub>)  $\delta$  7.62 (d,  $J = 8.2$  Hz, 2 H), 7.27 (d,  $J = 8.2$  Hz, 2 H), 4.32 (d,  $J = 7.7$  Hz, 1 H), 4.14 (q,  $J = 7.1$  Hz, 2 H), 3.01 (dd,  $J = 15.9, 7.7$  Hz, 1 H), 2.81 (dd,  $J = 15.9, 2.0$  Hz, 1 H), 2.50 (s, 3 H), 1.20 (t,  $J = 7.1$  Hz, 3 H); <sup>13</sup>C NMR (101 MHz, CDCl<sub>3</sub>)  $\delta$  165.5, 165.2, 162.3, 146.1, 133.0, 127.6, 118.4, 111.7, 109.0, 61.1, 38.1, 35.8, 19.0, 14.1; IR (KBr):  $\nu = 2983, 2926, 2229, 1790, 1716, 1650, 1608, 1504, 1415, 1372, 1292, 1271, 1243, 1170, 1120, 1075, 1032, 966, 867, 848, 785, 560$  cm<sup>-1</sup>; HRMS (EI,  $m/z$ ): calcd for [M]<sup>+</sup>, 285.1001; found, 285.1005.

(*R*)-Ethyl 6-methyl-2-oxo-4-(4-(trifluoromethyl)phenyl)-3,4-dihydro-2H-pyran-5-carboxylate (**3r**)

According to **G2** for 12 h: 42% yield, 93% ee (OD-H column, *n*-hexane/*i*-PrOH = 5/5, flow rate 0.7 mL/min,  $\lambda = 214$  nm,  $t_{\text{minor}} = 7.2$  min,  $t_{\text{major}} = 13.5$  min),  $[\alpha]_{\text{D}}^{20} = -133.3^{\circ}$  ( $c = 1$ , CHCl<sub>3</sub>), <sup>1</sup>H NMR (300 MHz, CDCl<sub>3</sub>)  $\delta$  7.57 (d,  $J = 7.9$  Hz, 2 H), 7.27 (d,  $J = 7.9$  Hz, 2 H), 4.33 (d,  $J = 7.8$  Hz, 1 H), 4.14 (q,  $J = 7.0$  Hz, 2 H), 3.00 (dd,  $J = 16.0, 7.8$  Hz, 1 H), 2.82 (dd,  $J = 16.0, 1.9$  Hz, 1 H), 2.50 (s, 3 H), 1.20 (t,  $J = 7.0$  Hz, 3 H); <sup>13</sup>C NMR (101 MHz, CDCl<sub>3</sub>)  $\delta$  165.6, 165.5, 162.0, 144.8, 130.0 (q,  $J = 32.3$  Hz), 127.1, 126.1 (q,  $J = 3.6$  Hz), 124.0 (q,  $J = 276.4$  Hz), 109.4, 61.0, 37.8, 36.0, 19.0, 14.0; IR (KBr):  $\nu = 2984, 2930, 1789, 1716, 1649, 1620, 1419, 1327, 1171, 1112, 1069, 1031, 847, 784$  cm<sup>-1</sup>; HRMS (EI,  $m/z$ ): calcd for [M]<sup>+</sup>, 328.0922; found, 328.0923.

(*R*)-Ethyl 4-(4-(methoxycarbonyl)phenyl)-6-methyl-2-oxo-3,4-dihydro-2H-pyran-5-carboxylate (**3s**)

According to **G2** for 12 h: 67% yield, 98% ee (OD-H column, *n*-hexane/*i*-PrOH = 7/3, flow rate 0.7 mL/min,  $\lambda = 214$  nm,  $t_{\text{minor}} = 10.9$  min,  $t_{\text{major}} = 27.2$  min),  $[\alpha]_{\text{D}}^{20} = -173.3^{\circ}$  ( $c = 1$ , CHCl<sub>3</sub>), <sup>1</sup>H NMR (300 MHz, CDCl<sub>3</sub>)  $\delta$  7.98 (d,  $J = 8.3$  Hz, 2 H), 7.22 (d,  $J = 8.3$  Hz, 2 H), 4.32 (d,  $J = 7.7$  Hz, 1 H), 4.13 (q,  $J = 7.1$  Hz, 2 H), 3.90 (s, 3 H), 2.99 (dd,  $J = 15.9, 7.7$  Hz, 1 H), 2.82 (dd,  $J = 15.9, 2.1$  Hz, 1 H), 2.50 (s, 3 H), 1.18 (t,  $J = 7.1$  Hz, 3 H); <sup>13</sup>C NMR (101 MHz, CDCl<sub>3</sub>)  $\delta$  166.6, 165.7, 165.6, 161.9, 145.9, 130.4, 129.6, 126.8, 109.4, 61.0, 52.1, 37.9, 36.0, 18.9, 14.1; IR (KBr):  $\nu = 2981, 2954, 2923, 1790, 1721, 1649, 1611, 1436, 1282, 1178, 1115, 1074, 1031, 963, 856, 772, 708$  cm<sup>-1</sup>; HRMS (EI,  $m/z$ ): calcd for [M]<sup>+</sup>, 318.1103; found, 318.1109.

(*R*)-Ethyl 4-(4-acetylphenyl)-6-methyl-2-oxo-3,4-dihydro-2H-pyran-5-carboxylate (**3t**)

According to **G2** for 12 h: 72% yield, 96% ee (AD-H column, *n*-hexane/*i*-PrOH = 5/5, flow rate 0.7 mL/min,  $\lambda = 214$  nm,  $t_{\text{minor}} = 10.1$  min,  $t_{\text{major}} = 17.7$  min),  $[\alpha]_{\text{D}}^{20} = -180.7^{\circ}$  ( $c = 1$ , CHCl<sub>3</sub>), <sup>1</sup>H NMR (300 MHz, CDCl<sub>3</sub>)  $\delta$  7.91 (d,  $J = 8.5$  Hz, 2 H), 7.25 (d,  $J = 8.5$  Hz, 2 H), 4.33 (d,  $J = 7.7$  Hz, 1 H), 4.13 (q,  $J = 7.1$  Hz, 2 H), 3.00 (dd,  $J = 15.8, 7.7$  Hz, 1 H), 2.82 (dd,  $J = 15.8, 2.3$  Hz, 1 H), 2.58 (s, 3 H), 2.50 (s, 3 H), 1.19 (t,  $J = 7.1$  Hz, 3 H); <sup>13</sup>C NMR (101 MHz, CDCl<sub>3</sub>)  $\delta$  197.4, 165.7, 165.6, 161.9, 146.1, 136.5, 129.2, 127.0, 109.4, 61.0, 37.9, 36.0, 26.6, 19.0, 14.1; IR (KBr):  $\nu = 2983, 2926, 1788, 1716, 1685, 1650, 1607, 1414, 1361, 1296, 1270, 1173, 1117, 1074, 1031, 959, 866, 847, 830, 782, 598$  cm<sup>-1</sup>; HRMS (EI,  $m/z$ ): calcd for [M]<sup>+</sup>, 302.1154; found, 302.1151.

(*R*)-Ethyl 6-methyl-4-(3-nitrophenyl)-2-oxo-3,4-dihydro-2H-pyran-5-carboxylate (**3u**)

According to **G2** for 24 h: 56% yield, 97% ee (OD-H column, *n*-hexane/*i*-PrOH = 5/5, flow rate 0.7 mL/min,  $\lambda = 214$  nm,  $t_{\text{minor}} = 10.0$  min,  $t_{\text{major}} = 19.9$  min),  $[\alpha]_{\text{D}}^{20} = -168.7^{\circ}$  ( $c = 1$ ,  $\text{CHCl}_3$ ),  $^1\text{H NMR}$  (300 MHz,  $\text{CDCl}_3$ )  $\delta$  8.15-8.00 (m, 2 H), 7.54-7.43 (m, 2 H), 4.38 (d,  $J = 7.9$  Hz, 1 H), 4.14 (q,  $J = 7.5$  Hz, 2 H), 3.02 (dd,  $J = 16.0, 7.5$  Hz, 1 H), 2.84 (dd,  $J = 16.0, 2.1$  Hz, 1 H), 2.50 (s, 3 H), 1.19 (t,  $J = 7.2$  Hz, 3 H);  $^{13}\text{C NMR}$  (101 MHz,  $\text{CDCl}_3$ )  $\delta$  165.5, 165.2, 162.6, 148.7, 142.9, 132.6, 130.2, 122.7, 122.1, 109.0, 61.2, 37.7, 36.0, 19.0, 14.1; IR (KBr):  $\nu = 2982, 2926, 1789, 1716, 1650, 1532, 1351, 1292, 1243, 1119, 1075, 1032, 862, 693$   $\text{cm}^{-1}$ ; HRMS (EI,  $m/z$ ): calcd for  $[\text{M}]^+$ , 305.0899; found, 305.0901.

(*S*)-Ethyl 4,6-dimethyl-2-oxo-3,4-dihydro-2H-pyran-5-carboxylate (**3v**)

According to **G2**, except that the reaction was performed at room temperature for 66 h. 81% yield, 83% ee (PA-2 column, *n*-hexane/*i*-PrOH = 8/2, flow rate 0.7 mL/min,  $\lambda = 214$  nm,  $t_{\text{minor}} = 13.5$  min,  $t_{\text{major}} = 26.2$  min),  $[\alpha]_{\text{D}}^{20} = -18.3^{\circ}$  ( $c = 1$ ,  $\text{CHCl}_3$ ),  $^1\text{H NMR}$  (300 MHz,  $\text{CDCl}_3$ )  $\delta$  4.30-4.14 (m, 2 H), 3.12-2.99 (m, 1 H), 2.65 (dd,  $J = 15.7, 6.4$  Hz, 1 H), 2.53 (dd,  $J = 15.6, 2.2$  Hz, 1 H), 2.32 (s, 3 H), 1.30 (t,  $J = 7.2$  Hz, 3 H), 1.09 (d,  $J = 7.1$  Hz, 3 H);  $^{13}\text{C NMR}$  (101 MHz,  $\text{CDCl}_3$ )  $\delta$  167.1, 166.2, 160.2, 112.3, 60.7, 35.7, 27.1, 19.3, 18.8, 14.2; IR (film):  $\nu = 2980, 2930, 1790, 1714, 1650, 1462, 1382, 1349, 1297, 1250, 1133, 1082, 1009, 983, 925, 844, 779$   $\text{cm}^{-1}$ ; HRMS (EI,  $m/z$ ): calcd for  $[\text{M}]^+$ , 198.0892; found, 198.0890.

(*R*)-Ethyl 6-ethyl-2-oxo-4-phenyl-3,4-dihydro-2H-pyran-5-carboxylate (**3w**)

According to **G2** for 22 h: 72% yield, 95% ee (Sino-AD column, *n*-hexane/*i*-PrOH = 98/2, flow rate 0.5 mL/min,  $\lambda = 214$  nm,  $t_{\text{major}} = 16.9$  min,  $t_{\text{minor}} = 18.8$  min),  $[\alpha]_{\text{D}}^{20} = -151.1^{\circ}$  ( $c = 1$ ,  $\text{CHCl}_3$ ),  $^1\text{H NMR}$  (300 MHz,  $\text{CDCl}_3$ )  $\delta$  7.35-7.08 (m, 5 H), 4.25 (dd,  $J = 7.3, 2.0$  Hz, 1 H), 4.13 (q,  $J = 7.1$  Hz, 2 H), 3.00-2.73 (m, 4 H), 1.28 (t,  $J = 7.3$  Hz,

3 H), 1.19 (t,  $J = 7.1$  Hz, 3 H).

(*R*)-Ethyl 2-oxo-4,6-diphenyl-3,4-dihydro-2H-pyran-5-carboxylate (**3x**)

According to **G2** for 24 h: 66% yield, 92% ee (PA-2 column, *n*-hexane/*i*-PrOH = 95/5, flow rate 0.7 mL/min,  $\lambda = 214$  nm,  $t_{\text{major}} = 28.3$  min,  $t_{\text{minor}} = 31.9$  min),  $[\alpha]_{\text{D}}^{20} = -70.0^{\circ}$  ( $c = 1$ , CHCl<sub>3</sub>), <sup>1</sup>H NMR (300 MHz, CDCl<sub>3</sub>)  $\delta$  7.56-7.20 (m, 10 H), 4.41 (dd,  $J = 7.6, 2.3$  Hz, 1 H), 4.02-3.84 (m, 2 H), 3.11 (dd,  $J = 15.8, 7.6$  Hz, 1 H), 2.94 (dd,  $J = 15.8, 2.3$  Hz, 1 H), 0.87 (t,  $J = 7.2$  Hz, 3 H); <sup>13</sup>C NMR (101 MHz, CDCl<sub>3</sub>)  $\delta$  166.4, 166.0, 158.6, 140.0, 133.2, 130.2, 129.2, 128.7, 128.0, 127.8, 126.8, 111.8, 61.0, 38.9, 36.4, 13.5.

(*R*)-5-Benzoyl-4,6-diphenyl-3,4-dihydro-2H-pyran-2-one (**3y**)

According to **G2** for 24 h: 90% yield, 90% ee (PA-2 column, *n*-hexane/*i*-PrOH = 8/2, flow rate 0.7 mL/min,  $\lambda = 214$  nm,  $t_{\text{major}} = 25.9$  min,  $t_{\text{minor}} = 39.9$  min),  $[\alpha]_{\text{D}}^{20} = -9.3^{\circ}$  ( $c = 1$ , CHCl<sub>3</sub>), <sup>1</sup>H NMR (300 MHz, CDCl<sub>3</sub>)  $\delta$  7.54-7.04 (m, 15 H), 4.57 (dd,  $J = 7.7, 2.3$  Hz, 1 H), 3.22 (dd,  $J = 16.0, 7.7$  Hz, 1 H), 3.06 (dd,  $J = 16.0, 2.3$  Hz, 1 H); <sup>13</sup>C NMR (101 MHz, CDCl<sub>3</sub>)  $\delta$  196.0, 166.7, 154.8, 139.8, 137.2, 132.6, 132.0, 130.3, 129.3, 129.0, 128.1, 128.0, 127.8, 126.9, 118.4, 40.4, 36.0.

## HPLC spectra

PA-2 column (*n*-hexane/*i*-PrOH = 98/2, flow rate 0.7 mL/min,  $\lambda$  = 214 nm)

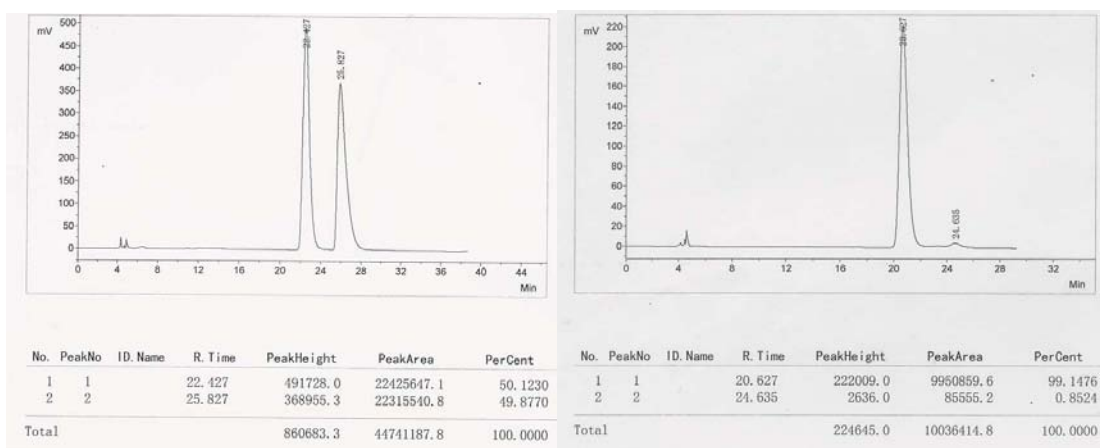

Sino-OD column (*n*-hexane/*i*-PrOH = 9/1, flow rate 0.7 mL/min,  $\lambda$  = 214 nm)

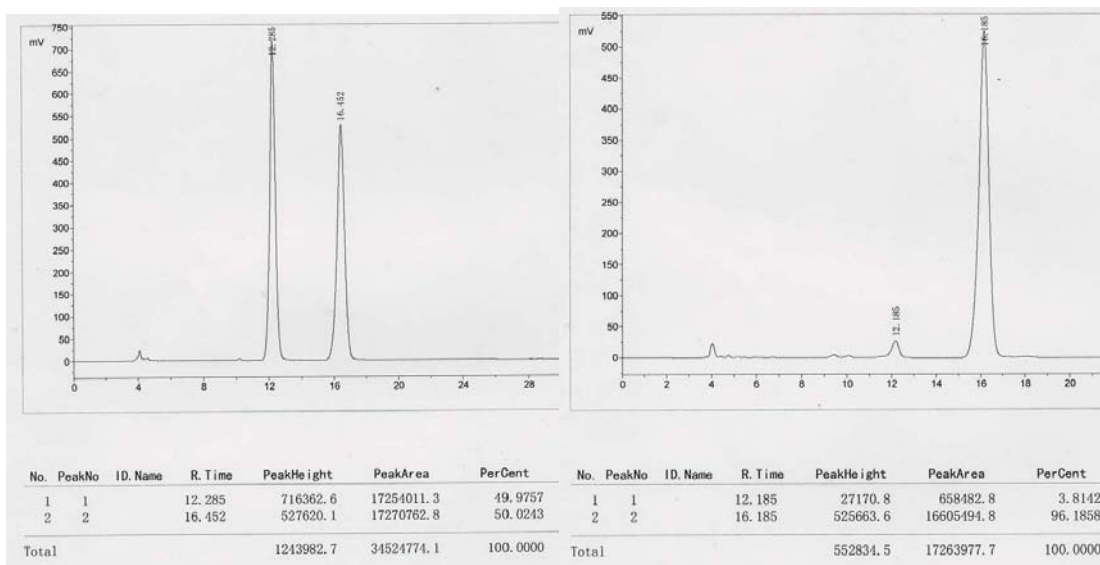

PA-2 column (*n*-hexane/*i*-PrOH = 98/2, flow rate 0.7 mL/min,  $\lambda = 214$  nm)

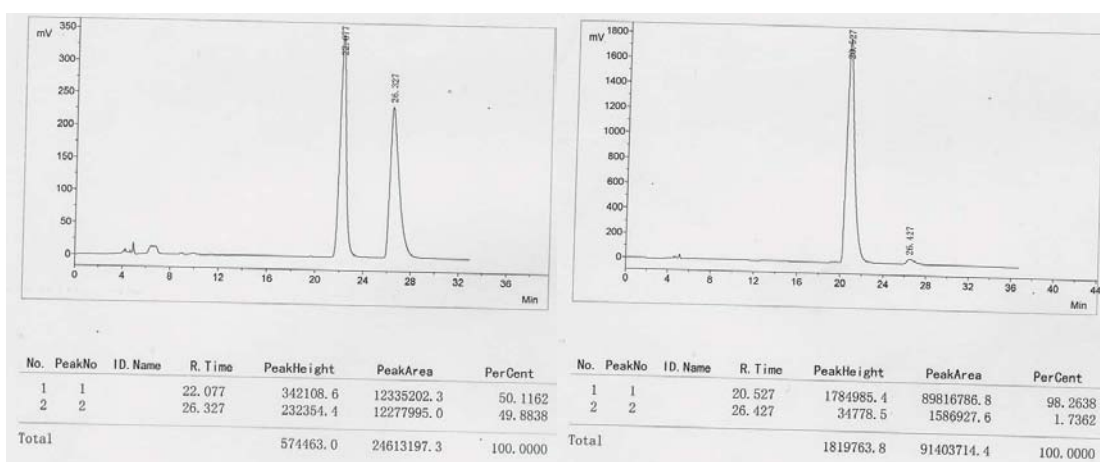

PA-2 column (*n*-hexane/*i*-PrOH = 98/2, flow rate 0.7 mL/min,  $\lambda = 214$  nm)

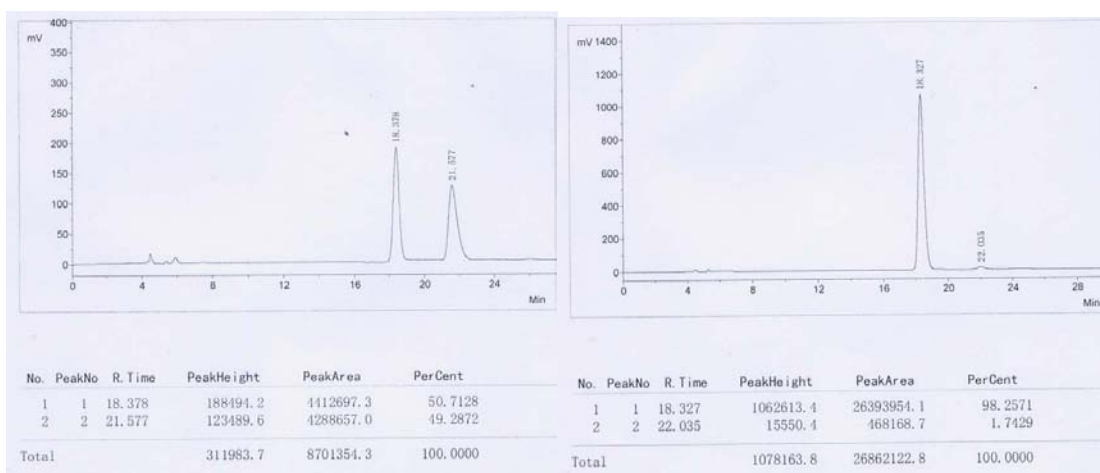

PA-2 column (*n*-hexane/*i*-PrOH = 98/2, flow rate 0.7 mL/min,  $\lambda = 214$  nm)

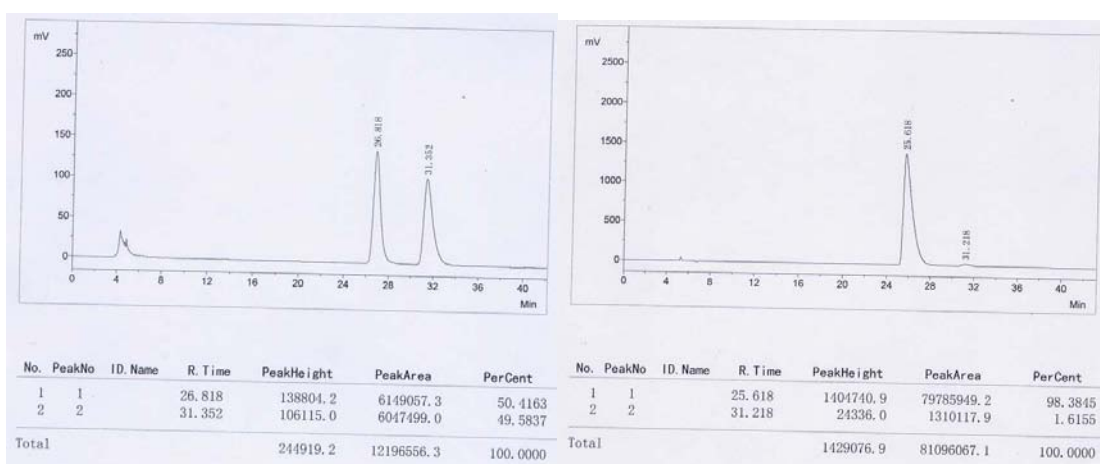

PA-2 column (*n*-hexane/*i*-PrOH = 98/2, flow rate 0.7 mL/min,  $\lambda = 214$  nm)

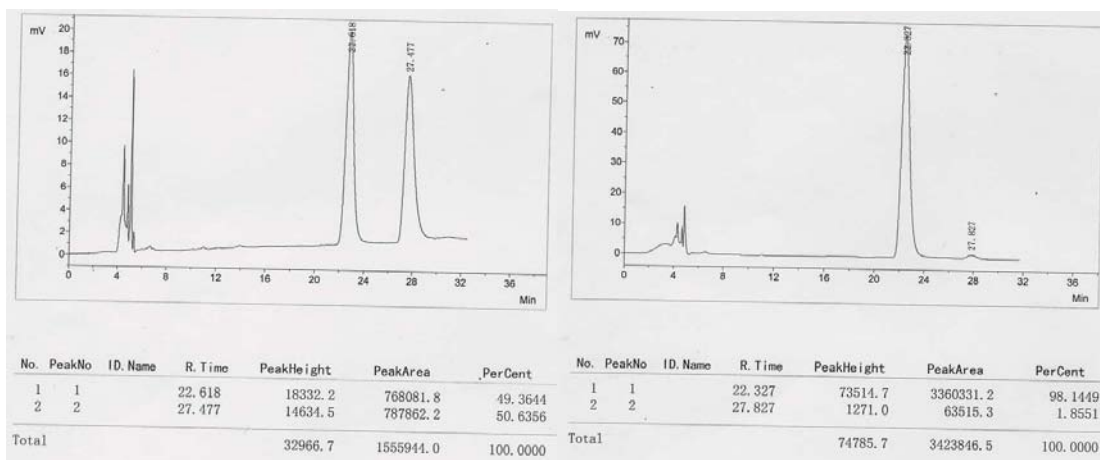



OD-H column (*n*-hexane/*i*-PrOH = 9/1, flow rate 0.7 mL/min,  $\lambda = 214$  nm)

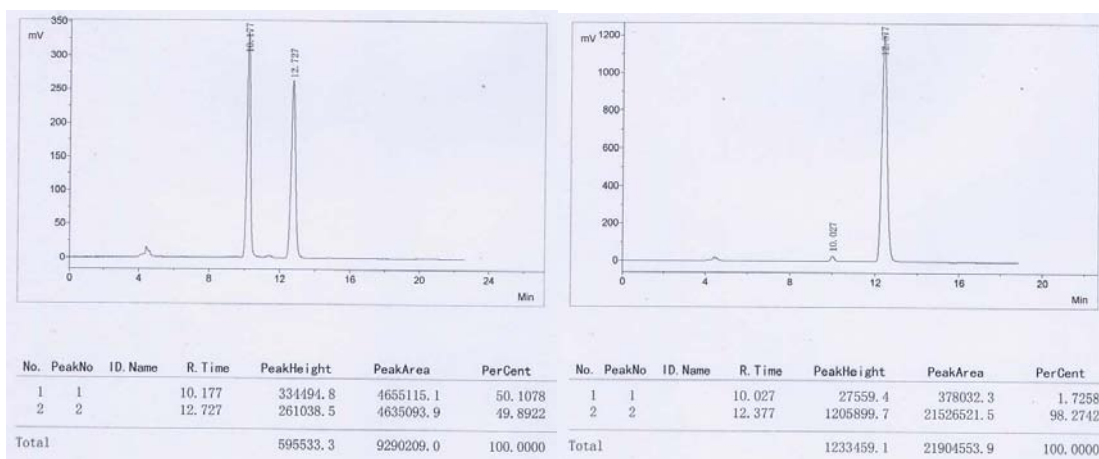

OD-H column (*n*-hexane/*i*-PrOH = 7/3, flow rate 0.7 mL/min,  $\lambda = 214$  nm)

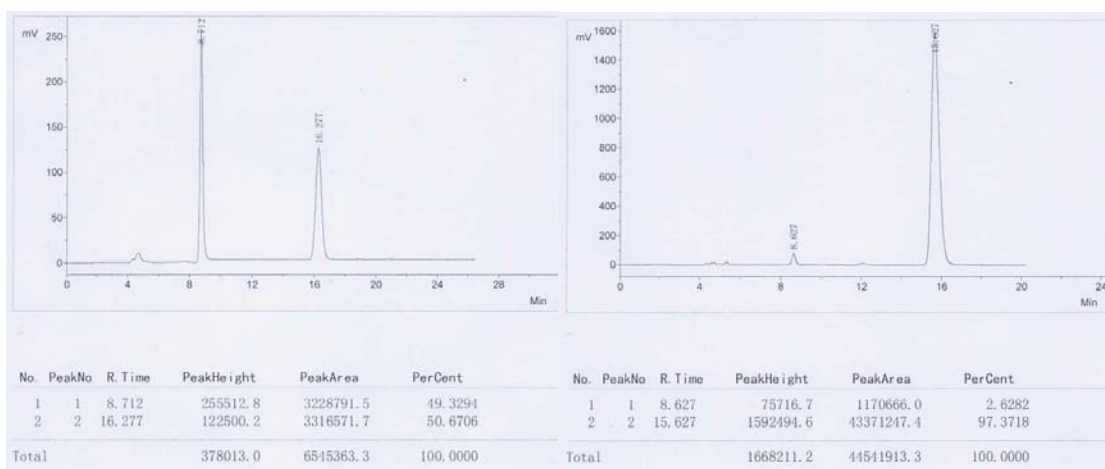

OD-H column (*n*-hexane/*i*-PrOH = 7/3, flow rate 0.7 mL/min,  $\lambda = 214$  nm)

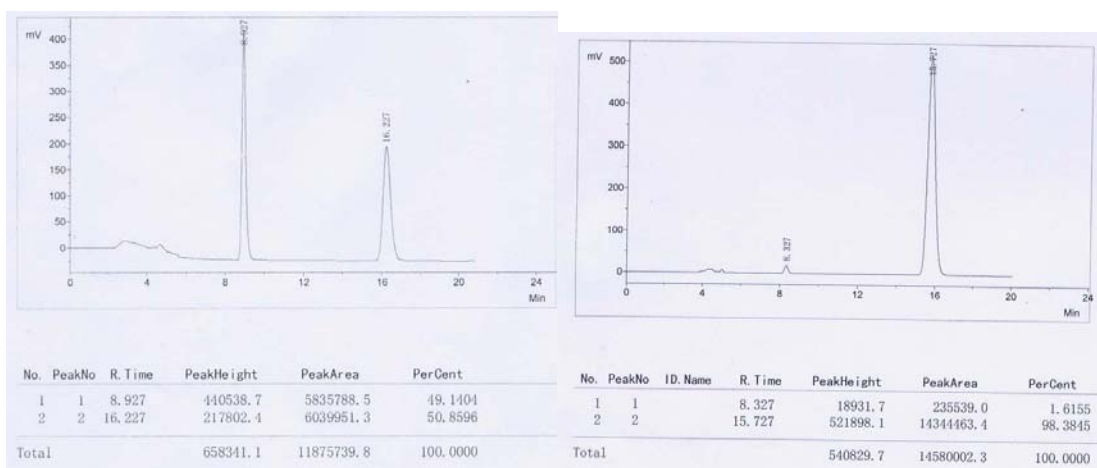

PA-2 column (*n*-hexane/*i*-PrOH = 7/3, flow rate 0.7 mL/min,  $\lambda = 214$  nm)

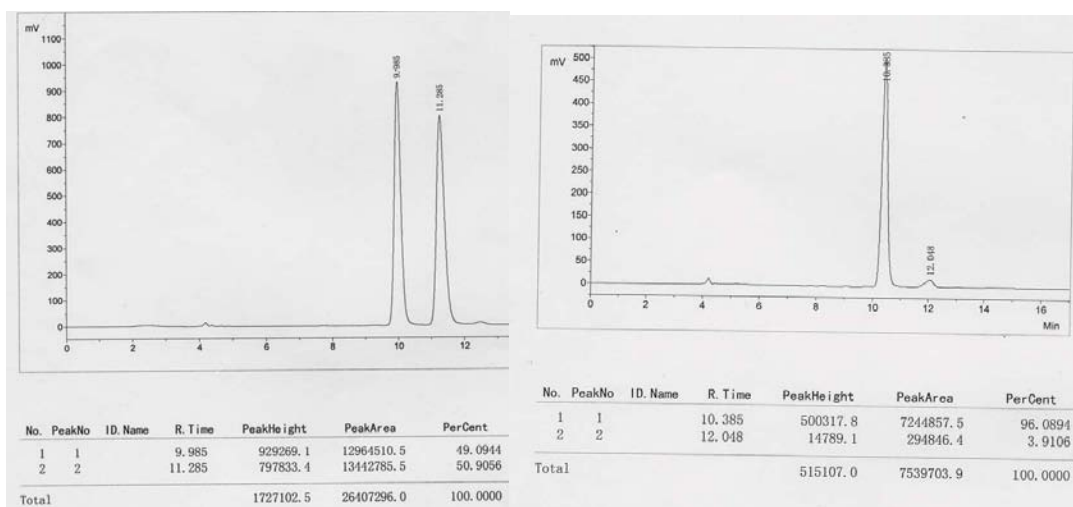

OJ-H column (*n*-hexane/*i*-PrOH = 9/1, flow rate 0.7 mL/min,  $\lambda = 214$  nm)

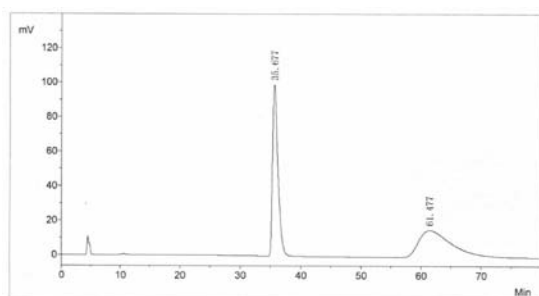

| No.   | PeakNo | ID. Name | R. Time | PeakHeight | PeakArea   | PerCent  |
|-------|--------|----------|---------|------------|------------|----------|
| 1     | 1      |          | 35.677  | 99187.8    | 6150412.5  | 50.7797  |
| 2     | 2      |          | 61.177  | 15596.3    | 5961547.0  | 49.2203  |
| Total |        |          |         | 114784.2   | 12111959.5 | 100.0000 |

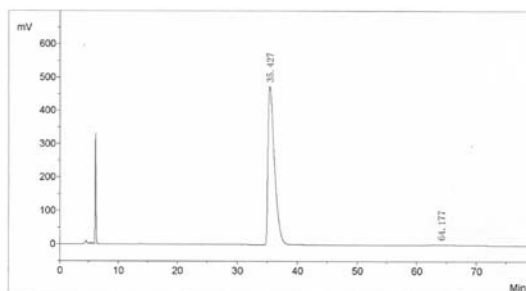

| No.   | PeakNo | ID. Name | R. Time | PeakHeight | PeakArea   | PerCent  |
|-------|--------|----------|---------|------------|------------|----------|
| 1     | 1      |          | 35.427  | 473983.1   | 35524545.6 | 98.3987  |
| 2     | 2      |          | 64.177  | 1600.7     | 578106.8   | 1.6013   |
| Total |        |          |         | 475583.8   | 36102652.4 | 100.0000 |

PA-2 column (*n*-hexane/*i*-PrOH = 9/1, flow rate 0.7 mL/min,  $\lambda = 214$  nm)

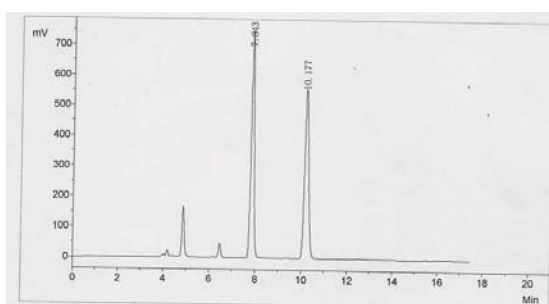

| No.   | PeakNo | ID. Name | R. Time | PeakHeight | PeakArea   | PerCent  |
|-------|--------|----------|---------|------------|------------|----------|
| 1     | 1      |          | 7.843   | 743125.9   | 6698840.0  | 49.2208  |
| 2     | 2      |          | 10.177  | 540599.5   | 6910948.3  | 50.7792  |
| Total |        |          |         | 1283725.4  | 13609788.3 | 100.0000 |

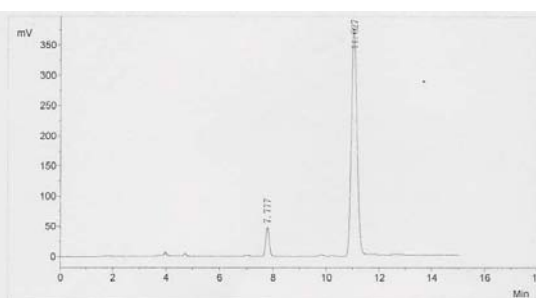

| No.   | PeakNo | R. Time | PeakHeight | PeakArea  | PerCent   |          |
|-------|--------|---------|------------|-----------|-----------|----------|
| 1     | 1      | 7.777   | 47541.4    | 461628.7  | 7.5856    |          |
| 2     | 2      | 11.027  | 376636.3   | 5623939.8 | 92.4144   |          |
| Total |        |         |            | 424177.7  | 6085568.6 | 100.0000 |

PC-2 column (*n*-hexane/*i*-PrOH = 7/3, flow rate 0.7 mL/min,  $\lambda = 214$  nm)

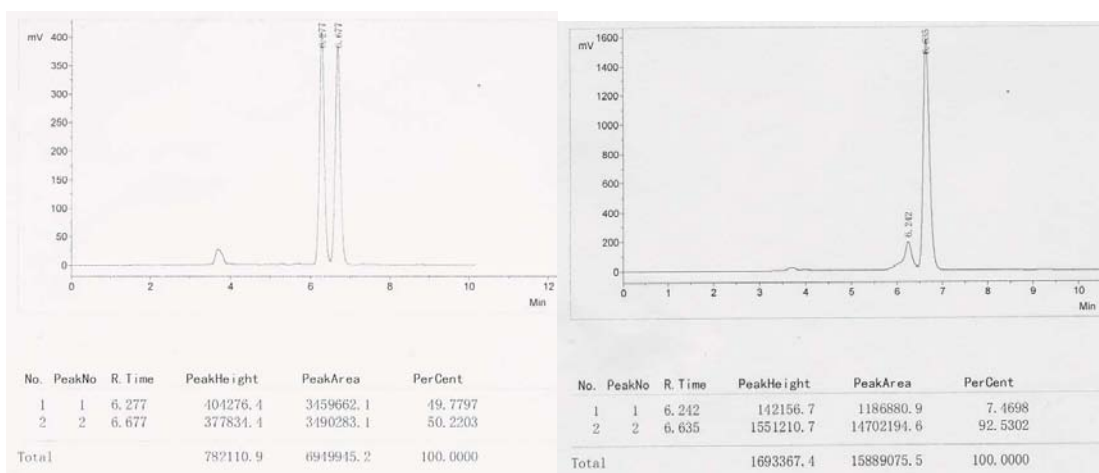

Sino-AD column (*n*-hexane/*i*-PrOH = 98/2, flow rate 0.5 mL/min,  $\lambda = 214$  nm)

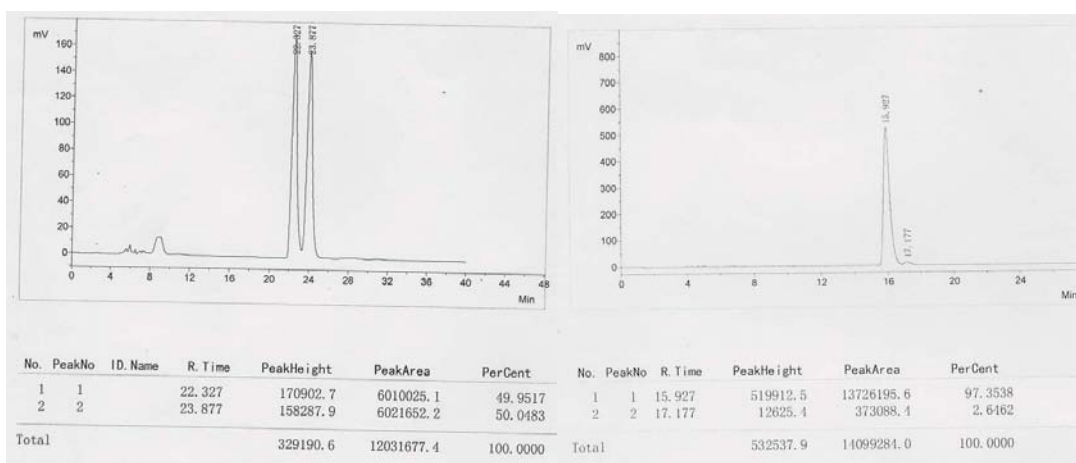

Sino-OD column (*n*-hexane/*i*-PrOH = 9/1, flow rate 0.7 mL/min,  $\lambda = 214$  nm)

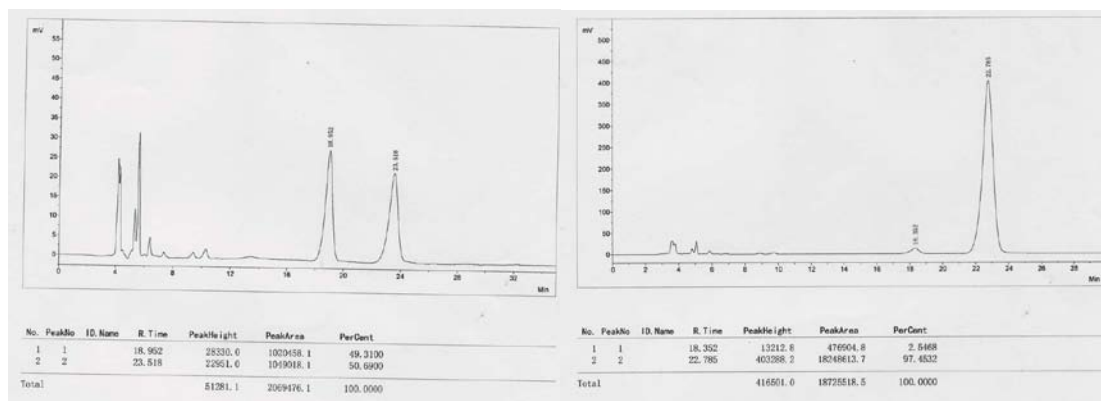

PA-2 column (*n*-hexane/*i*-PrOH = 7/3, flow rate 0.7 mL/min,  $\lambda = 214$  nm)

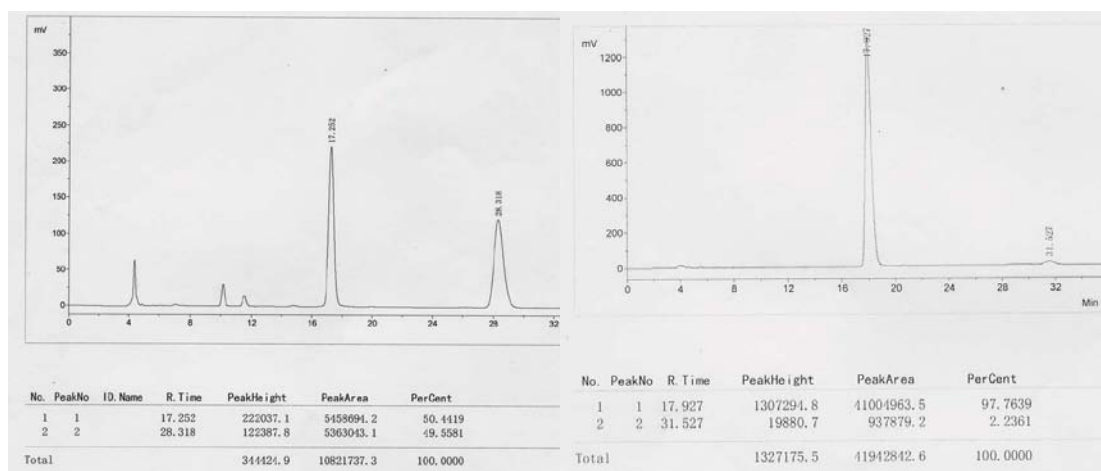

OD-H column (*n*-hexane/*i*-PrOH = 5/5, flow rate 0.7 mL/min,  $\lambda = 214$  nm)

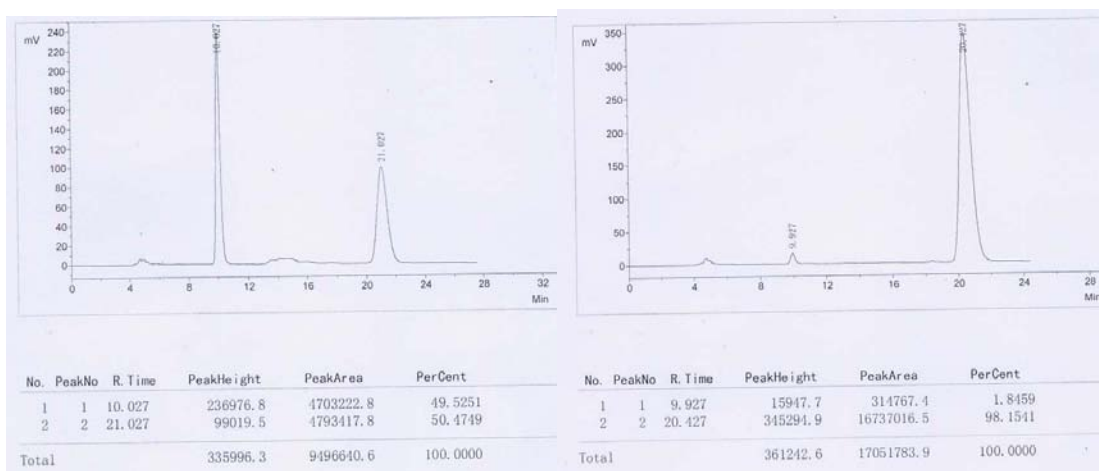

OD-H column (*n*-hexane/*i*-PrOH = 5/5, flow rate 0.7 mL/min,  $\lambda = 214$  nm)

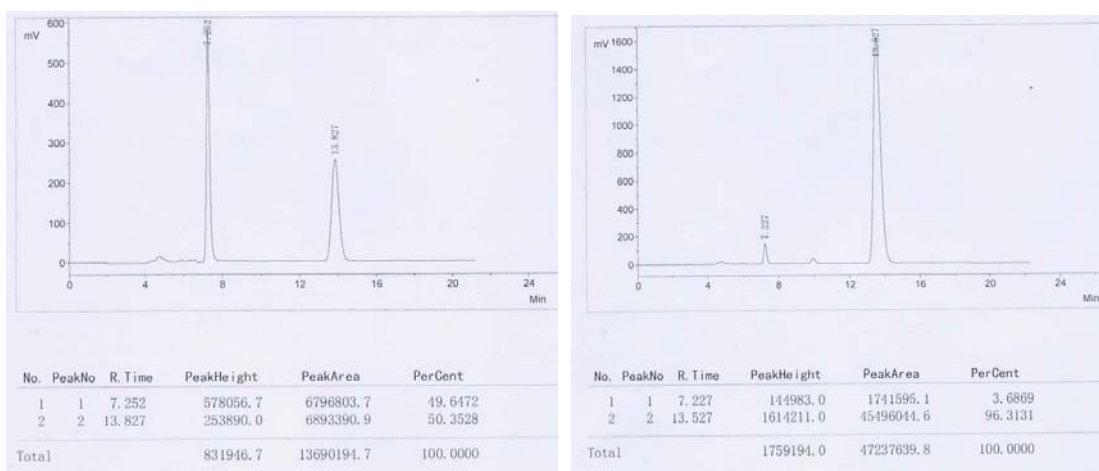

OD-H column (*n*-hexane/*i*-PrOH = 7/3, flow rate 0.7 mL/min,  $\lambda = 214$  nm)

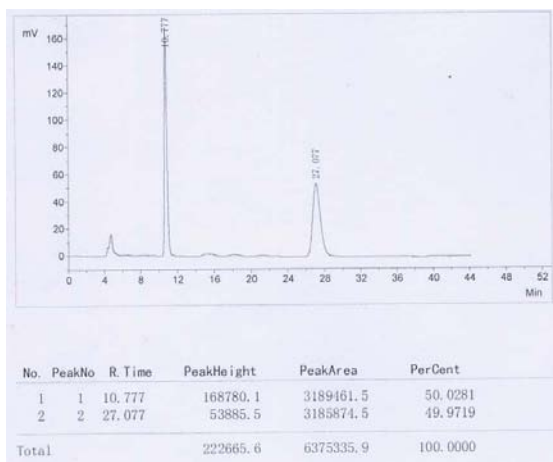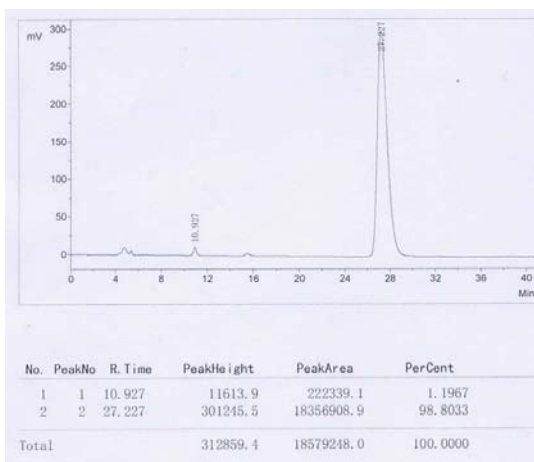

AD-H column (*n*-hexane/*i*-PrOH = 5/5, flow rate 0.7 mL/min,  $\lambda = 214$  nm)

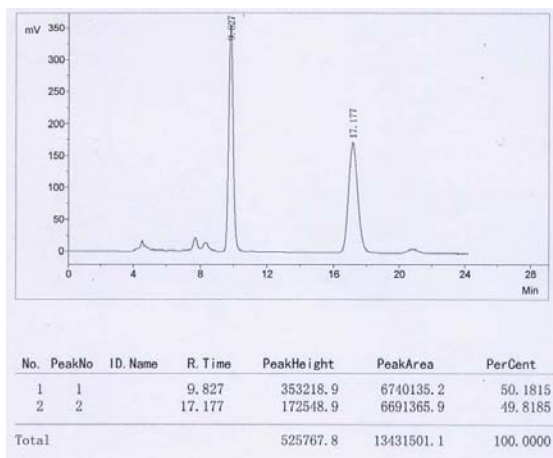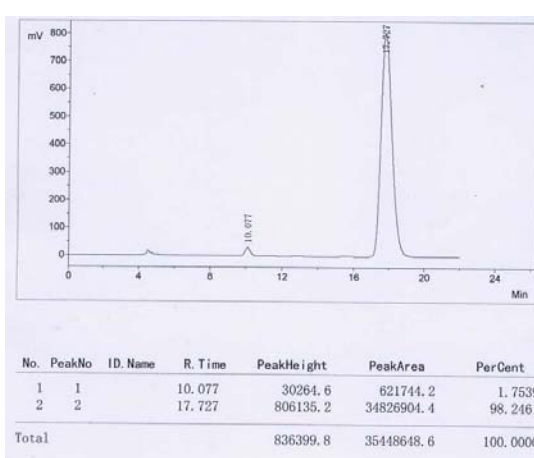

OD-H column (*n*-hexane/*i*-PrOH = 5/5, flow rate 0.7 mL/min,  $\lambda = 214$  nm)

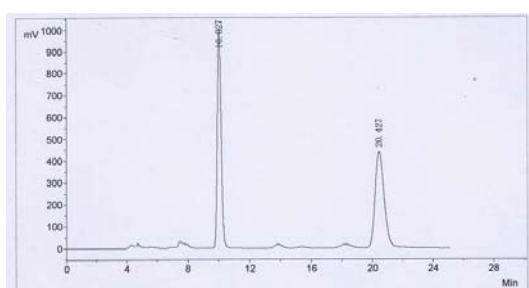

| No.   | PeakNo | ID. Name | R. Time | PeakHeight | PeakArea   | PerCent  |
|-------|--------|----------|---------|------------|------------|----------|
| 1     | 1      |          | 10.027  | 1005602.0  | 18241787.1 | 49.7058  |
| 2     | 2      |          | 20.427  | 439156.0   | 18457732.7 | 50.2942  |
| Total |        |          |         | 1444757.9  | 36699519.8 | 100.0000 |

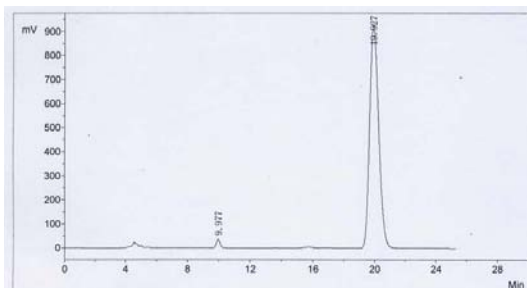

| No.   | PeakNo | ID. Name | R. Time | PeakHeight | PeakArea   | PerCent  |
|-------|--------|----------|---------|------------|------------|----------|
| 1     | 1      |          | 9.977   | 33959.5    | 585012.8   | 1.5102   |
| 2     | 2      |          | 19.927  | 930339.5   | 38152546.9 | 98.4898  |
| Total |        |          |         | 964299.0   | 38737559.7 | 100.0000 |

PA-2 column (*n*-hexane/*i*-PrOH = 8/2, flow rate 0.7 mL/min,  $\lambda = 214$  nm)

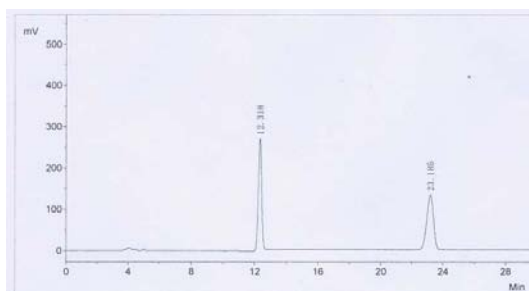

| No.   | PeakNo | R. Time | PeakHeight | PeakArea  | PerCent  |
|-------|--------|---------|------------|-----------|----------|
| 1     | 1      | 12.318  | 269093.5   | 4077073.4 | 50.7295  |
| 2     | 2      | 23.185  | 131888.9   | 3959819.5 | 49.2705  |
| Total |        |         | 400982.3   | 8036892.9 | 100.0000 |

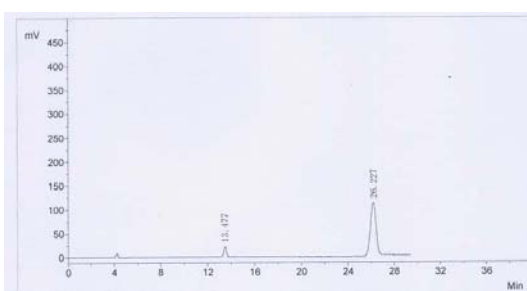

| No.   | PeakNo | R. Time | PeakHeight | PeakArea  | PerCent  |
|-------|--------|---------|------------|-----------|----------|
| 1     | 1      | 13.477  | 21952.6    | 364791.9  | 8.4235   |
| 2     | 2      | 26.227  | 111943.7   | 3965875.5 | 91.5765  |
| Total |        |         | 133896.3   | 4330667.3 | 100.0000 |



Sino-AD column (*n*-hexane/*i*-PrOH = 98/2, flow rate 0.5 mL/min,  $\lambda = 214$  nm)

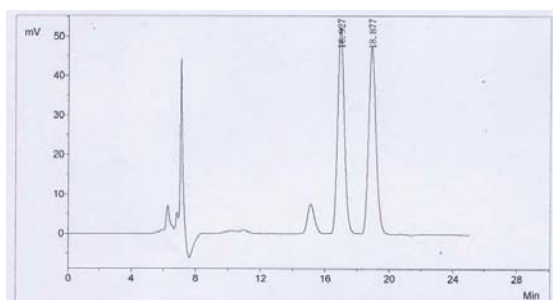

| No.   | PeakNo | ID. Name | R. Time | PeakHeight | PeakArea  | PerCent  |
|-------|--------|----------|---------|------------|-----------|----------|
| 1     | 1      |          | 16.927  | 51960.3    | 1520751.8 | 49.9799  |
| 2     | 2      |          | 18.877  | 47347.5    | 1521973.1 | 50.0201  |
| Total |        |          |         | 99307.9    | 3042724.9 | 100.0000 |

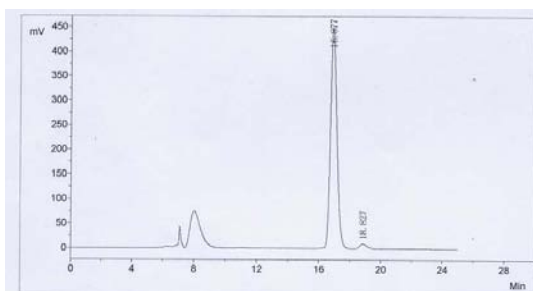

| No.   | PeakNo | ID. Name | R. Time | PeakHeight | PeakArea   | PerCent  |
|-------|--------|----------|---------|------------|------------|----------|
| 1     | 1      |          | 16.877  | 449044.0   | 12943376.6 | 97.6955  |
| 2     | 2      |          | 18.827  | 9704.2     | 305321.7   | 2.3045   |
| Total |        |          |         | 458748.2   | 13248698.3 | 100.0000 |

PA-2 column (*n*-hexane/*i*-PrOH = 95/5, flow rate 1.0 mL/min,  $\lambda = 214$  nm)

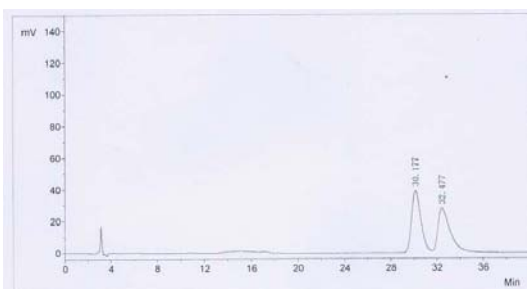

| No.   | PeakNo | R. Time | PeakHeight | PeakArea  | PerCent  |
|-------|--------|---------|------------|-----------|----------|
| 1     | 1      | 30.177  | 39241.1    | 2211322.1 | 51.2510  |
| 2     | 2      | 32.477  | 28089.2    | 2103368.3 | 48.7490  |
| Total |        |         | 67330.3    | 4314690.4 | 100.0000 |

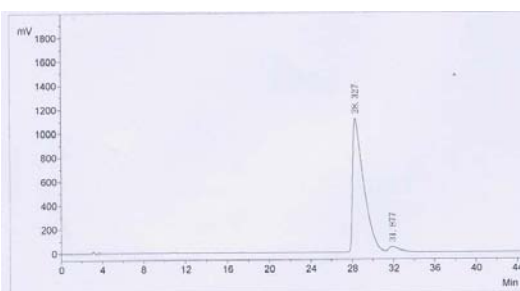

| No.   | PeakNo | R. Time | PeakHeight | PeakArea   | PerCent  |
|-------|--------|---------|------------|------------|----------|
| 1     | 1      | 28.327  | 1119318.6  | 83535531.3 | 95.7784  |
| 2     | 2      | 31.877  | 46837.5    | 3681993.4  | 4.2216   |
| Total |        |         | 1166156.1  | 87217524.7 | 100.0000 |

PA-2 column (*n*-hexane/*i*-PrOH = 8/2, flow rate 0.7 mL/min,  $\lambda = 214$  nm)

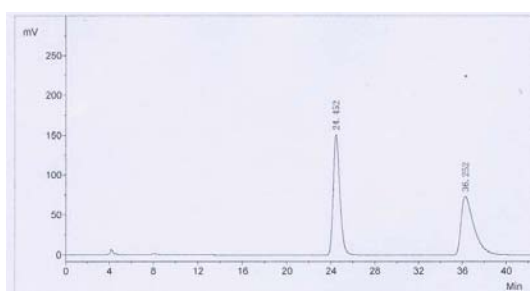

| No.   | PeakNo | R. Time | PeakHeight | PeakArea   | PerCent  |
|-------|--------|---------|------------|------------|----------|
| 1     | 1      | 24.452  | 151831.4   | 6352467.9  | 51.0649  |
| 2     | 2      | 36.252  | 74471.2    | 6087532.3  | 48.9351  |
| Total |        |         | 226302.6   | 12440000.3 | 100.0000 |

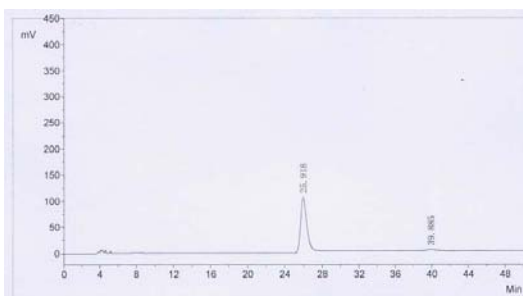

| No.   | PeakNo | R. Time | PeakHeight | PeakArea  | PerCent  |
|-------|--------|---------|------------|-----------|----------|
| 1     | 1      | 25.918  | 105413.0   | 4965162.1 | 95.1733  |
| 2     | 2      | 39.885  | 2810.0     | 251808.1  | 4.8267   |
| Total |        |         | 108223.0   | 5216970.3 | 100.0000 |

### $^1\text{H}$ NMR of **3a**

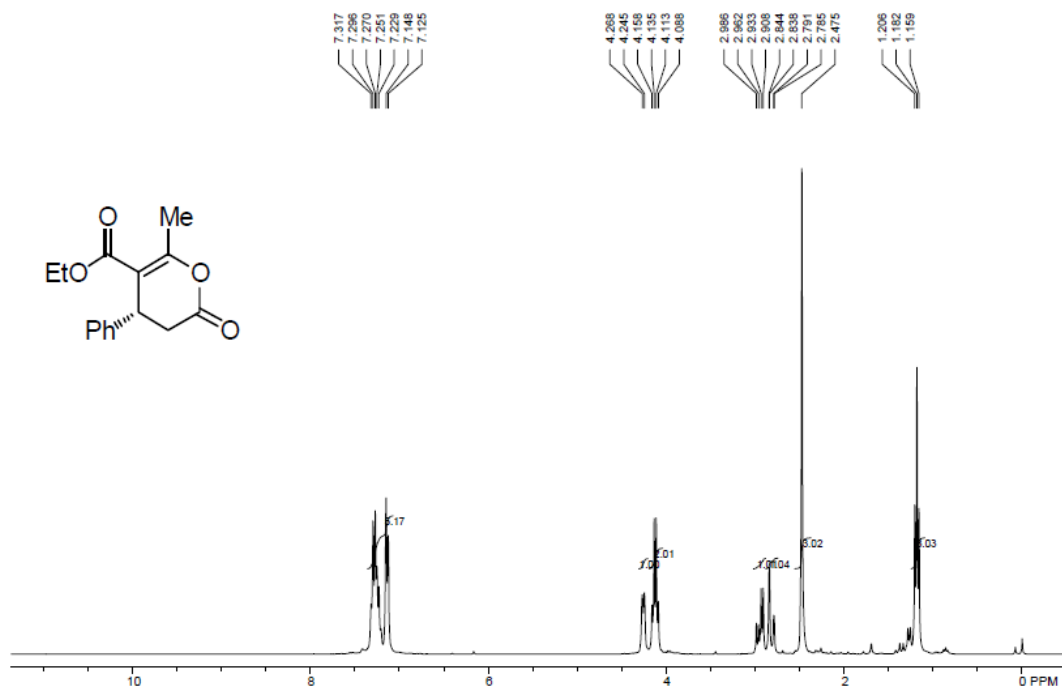

### $^1\text{H}$ NMR of **3b**

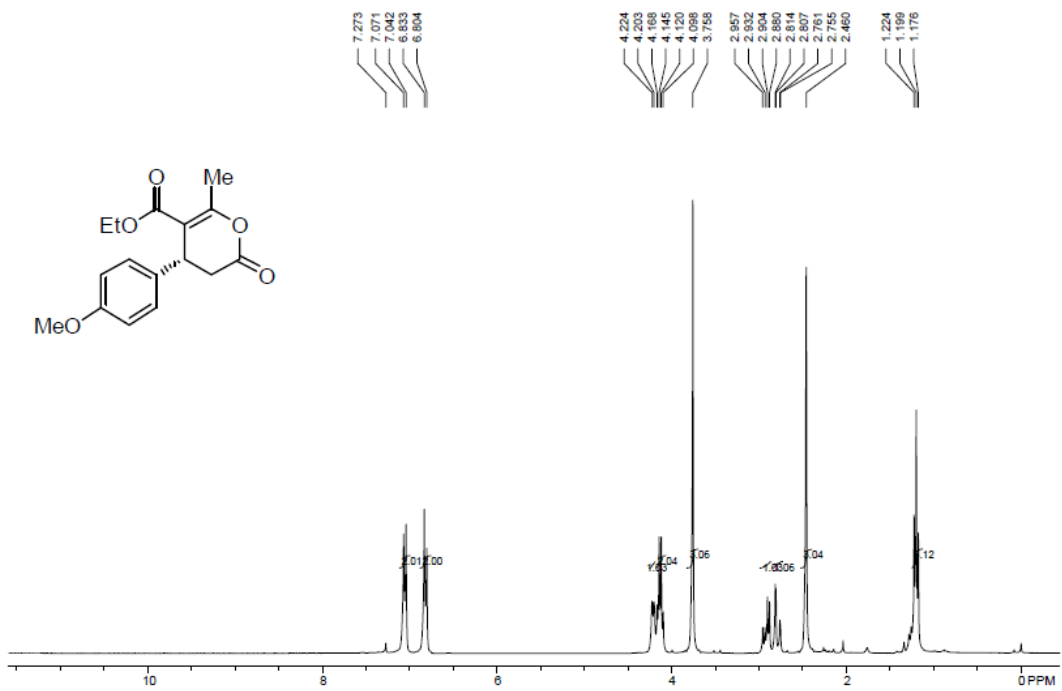

### $^1\text{H}$ NMR of **3c**

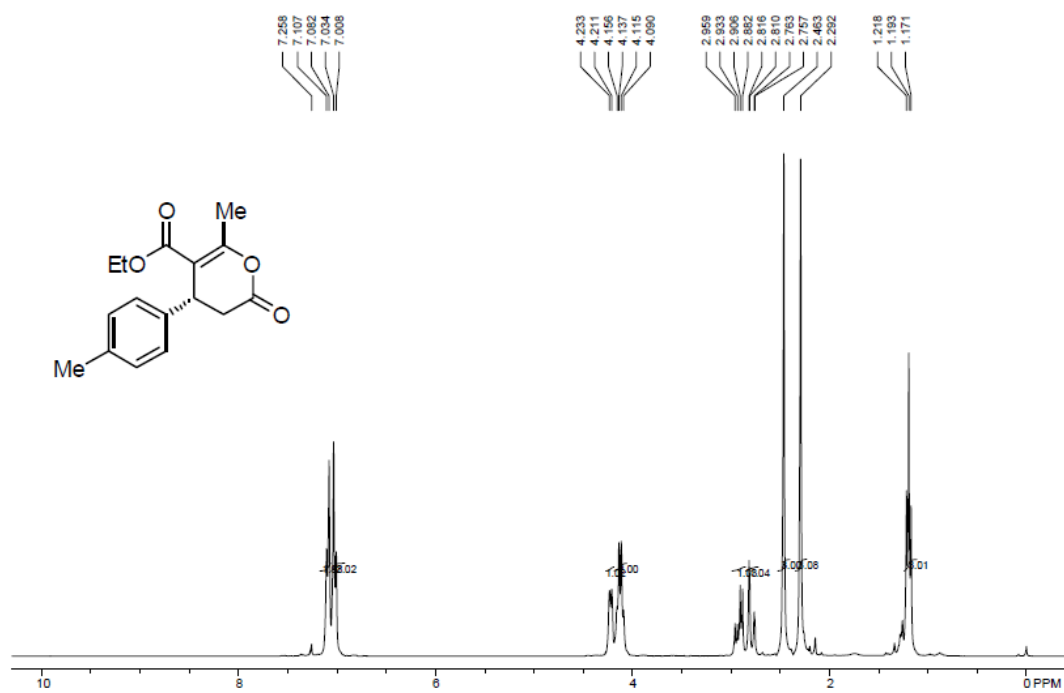

### $^1\text{H}$ NMR of **3d**

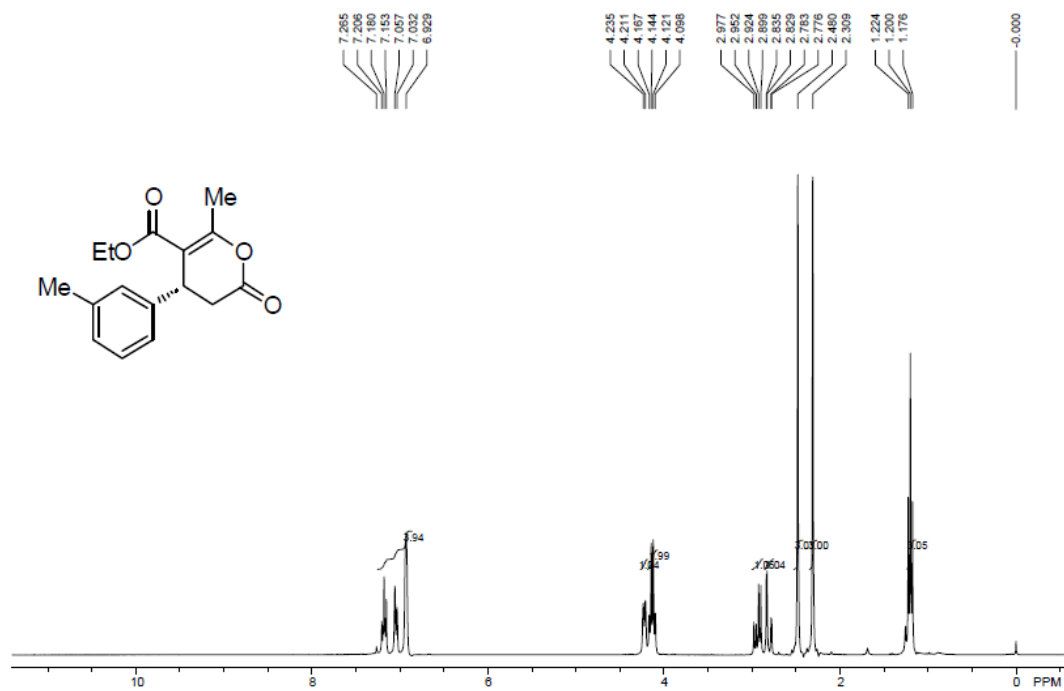

### $^{13}\text{C}$ NMR of **3d**

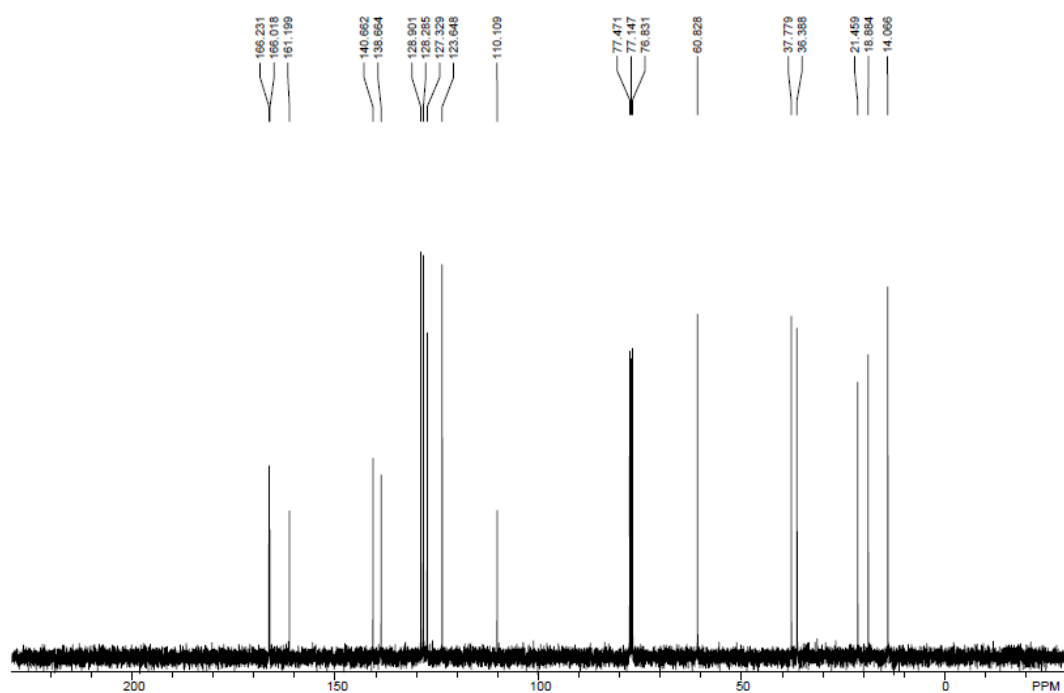

### $^1\text{H}$ NMR of **3e**

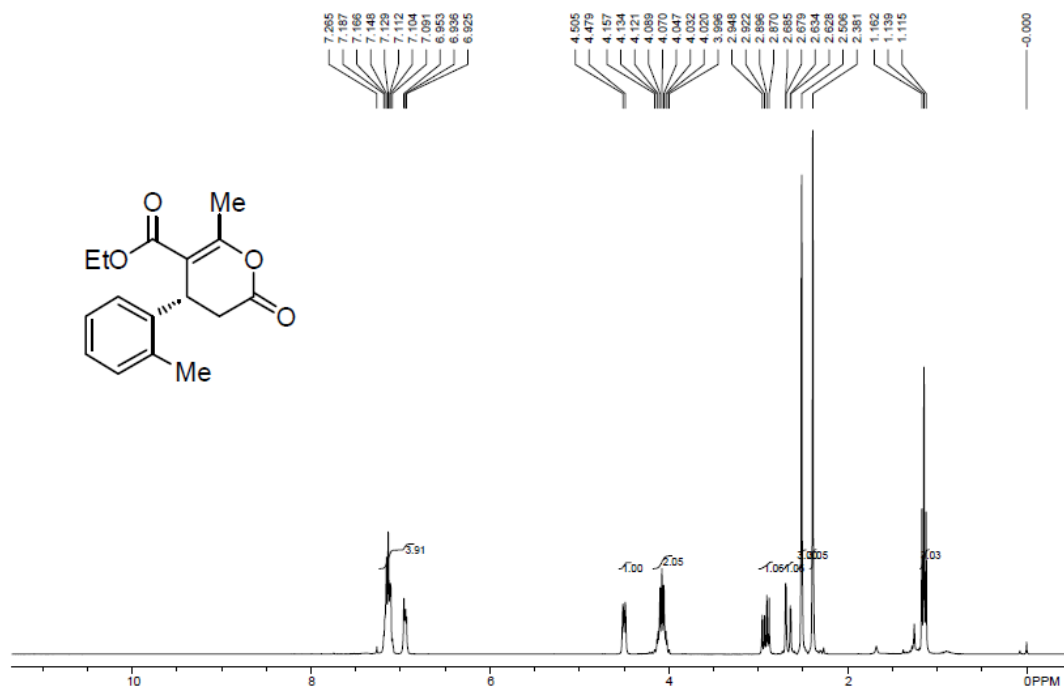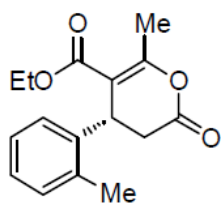

$^{13}\text{C}$  NMR of **3e**

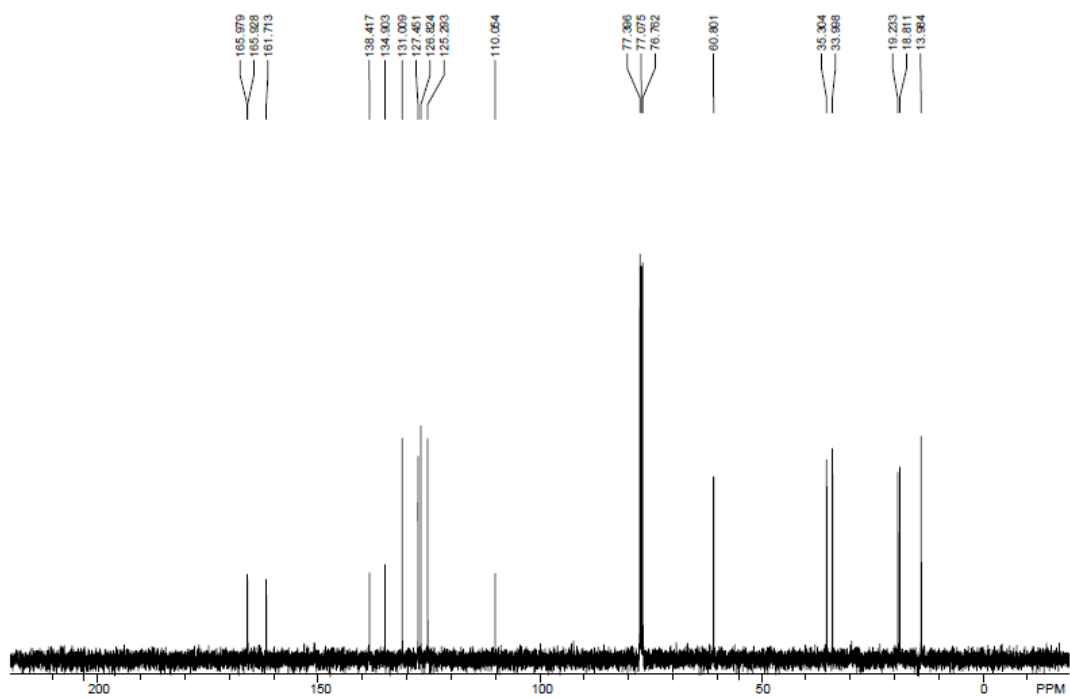

$^1\text{H}$  NMR of **3f**

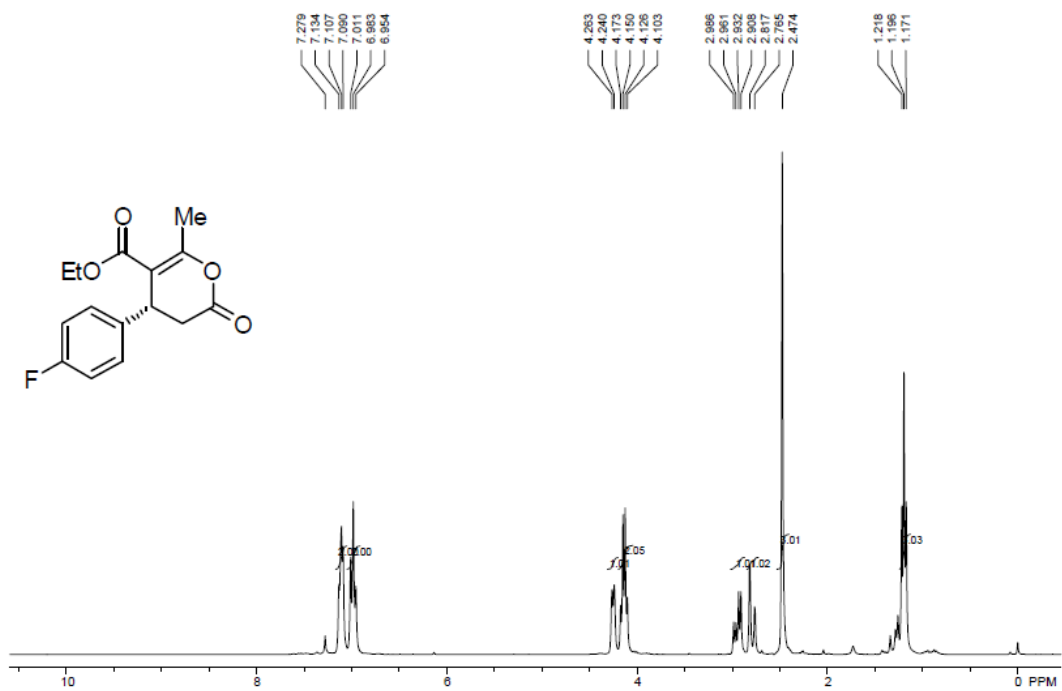

$^1\text{H}$  NMR of **3g**

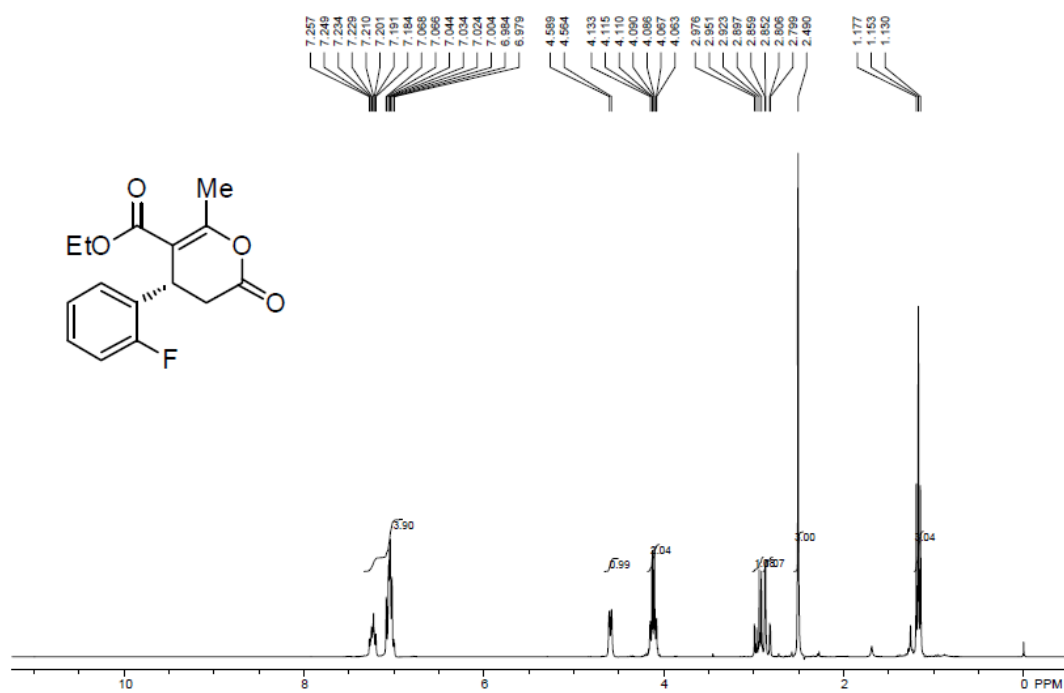

$^{19}\text{F}$  NMR of **3g**

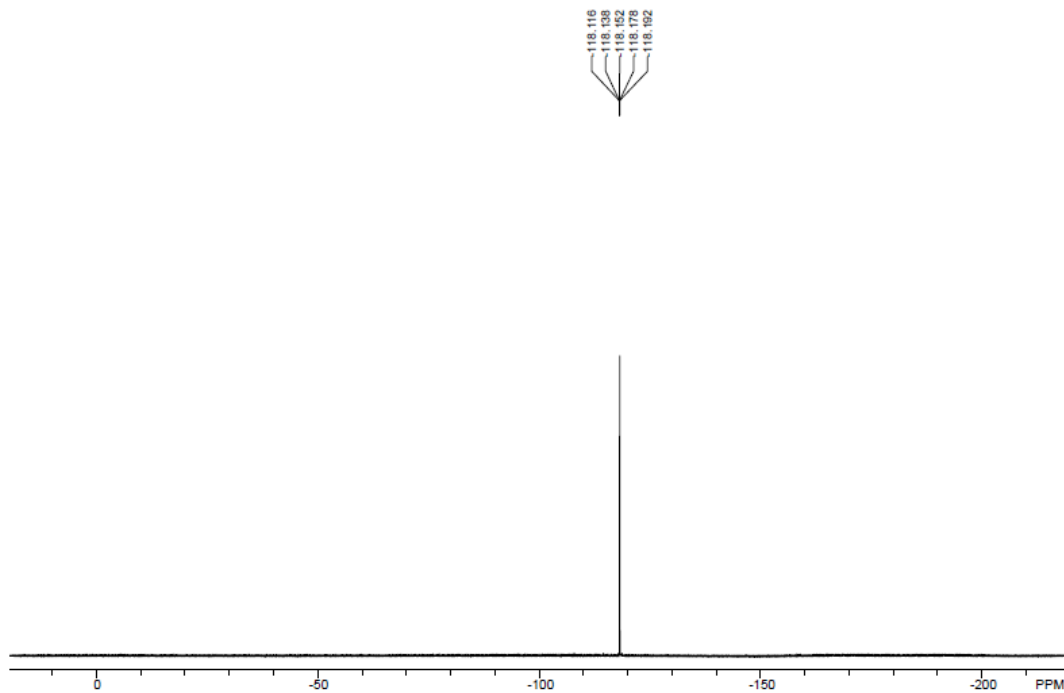

### $^{13}\text{C}$ NMR of **3g**

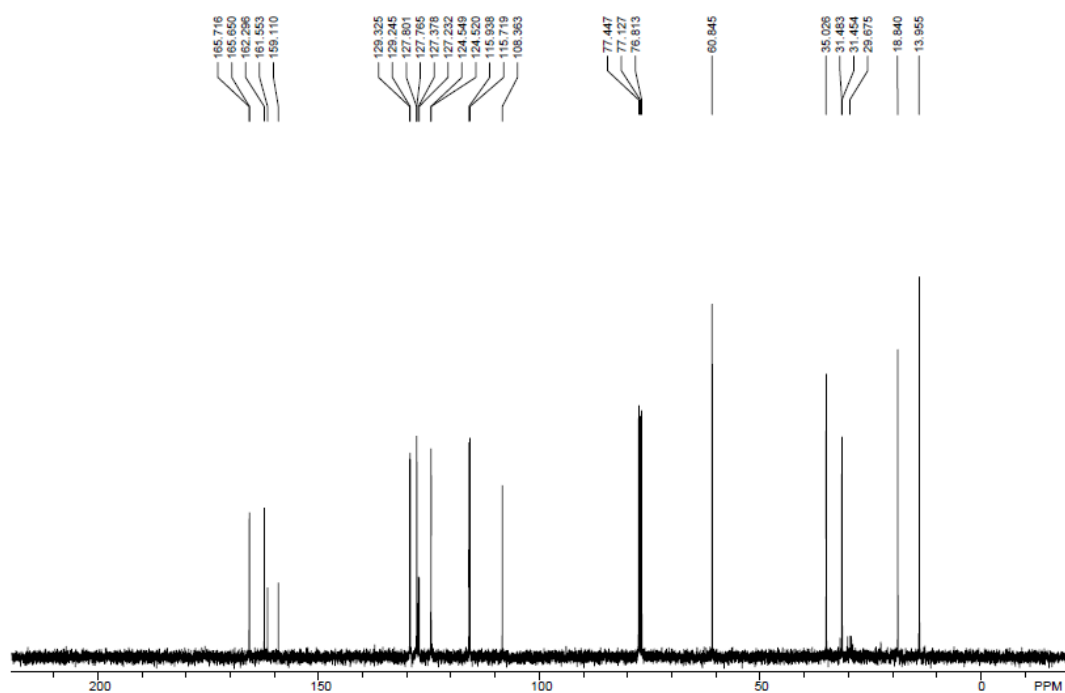

### $^1\text{H}$ NMR of **3h**

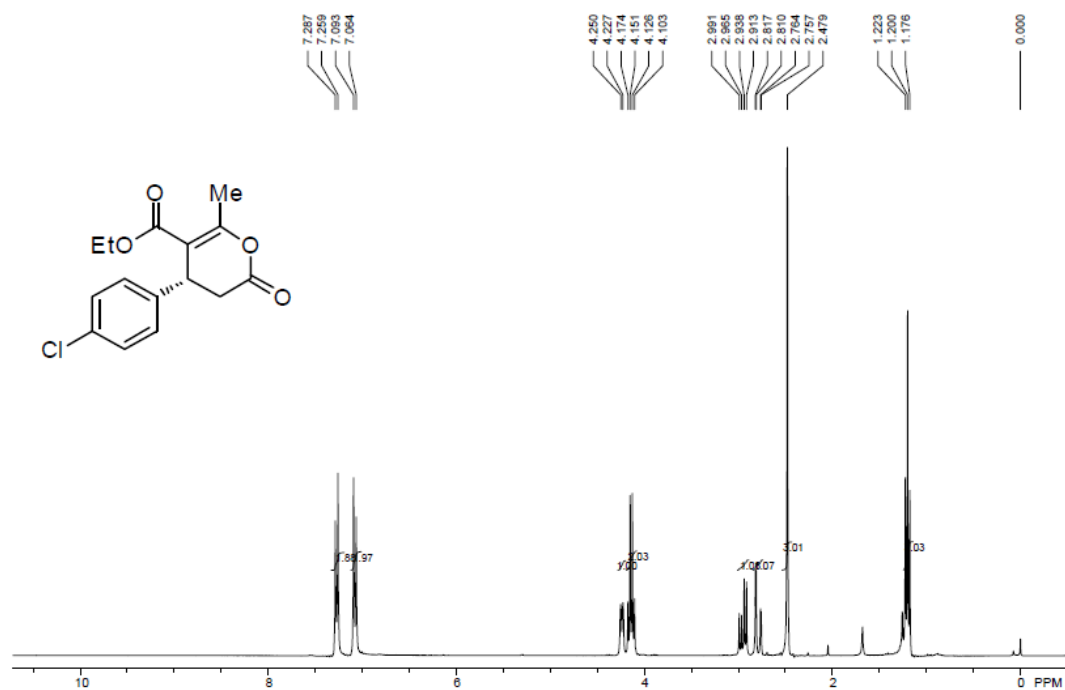



### $^{13}\text{C}$ NMR of **3h**

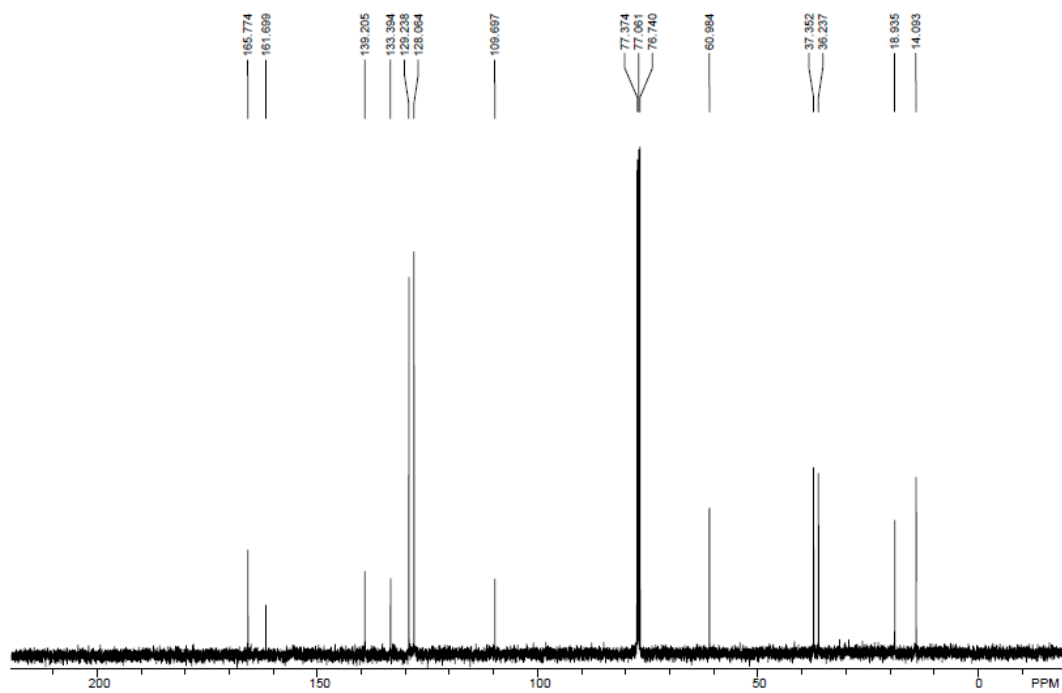

### $^1\text{H}$ NMR of **3i**

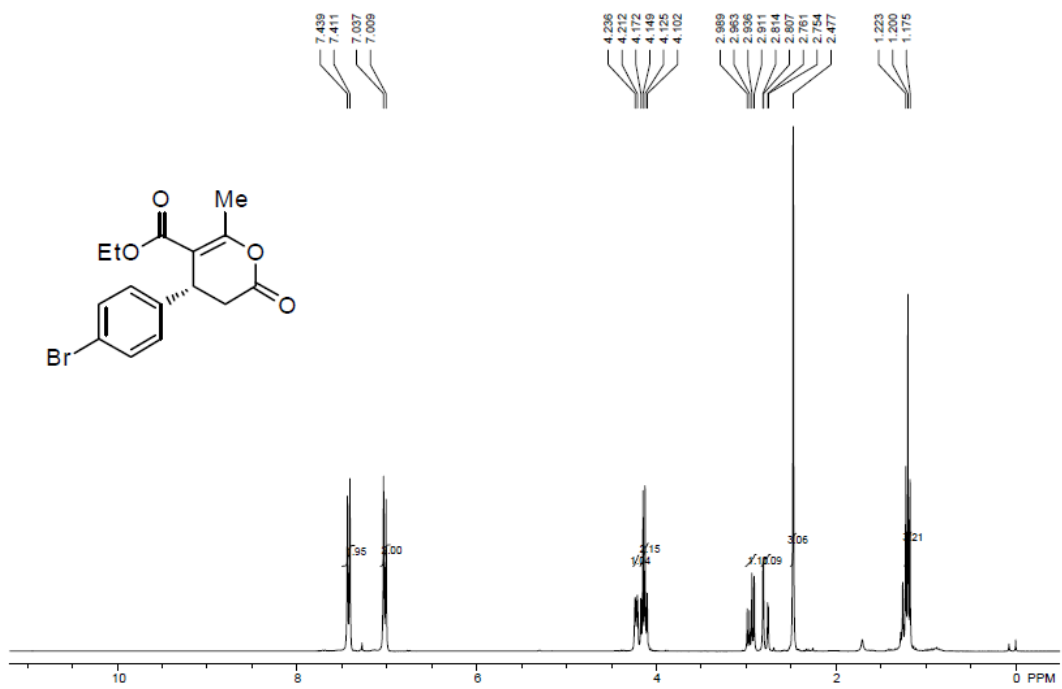



### $^1\text{H}$ NMR of **31**

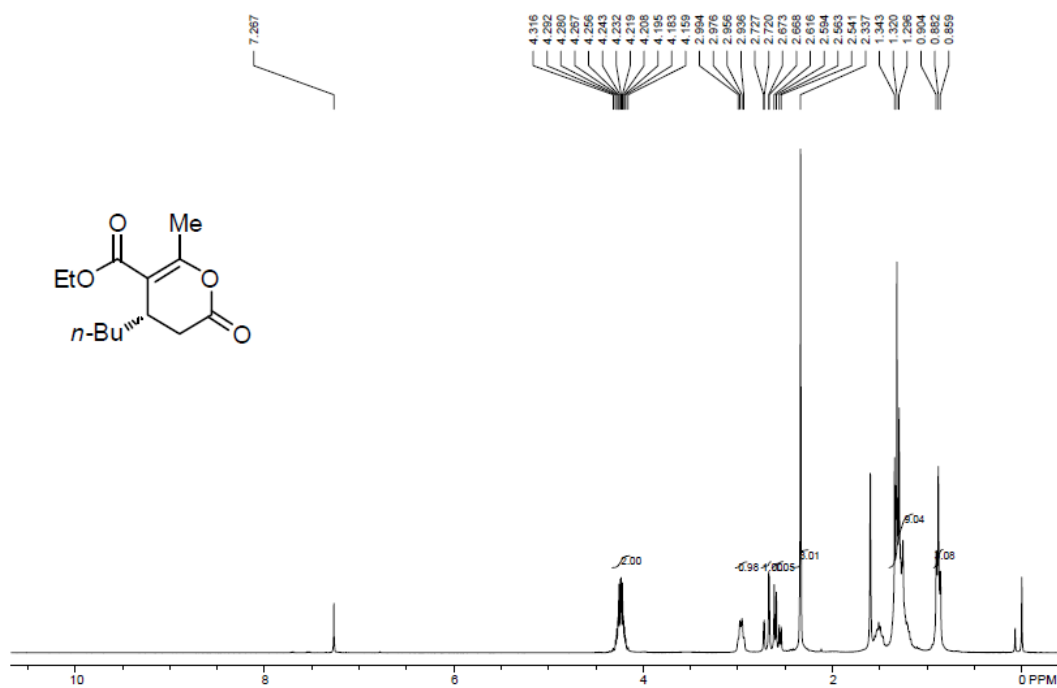

### $^{13}\text{C}$ NMR of **31**

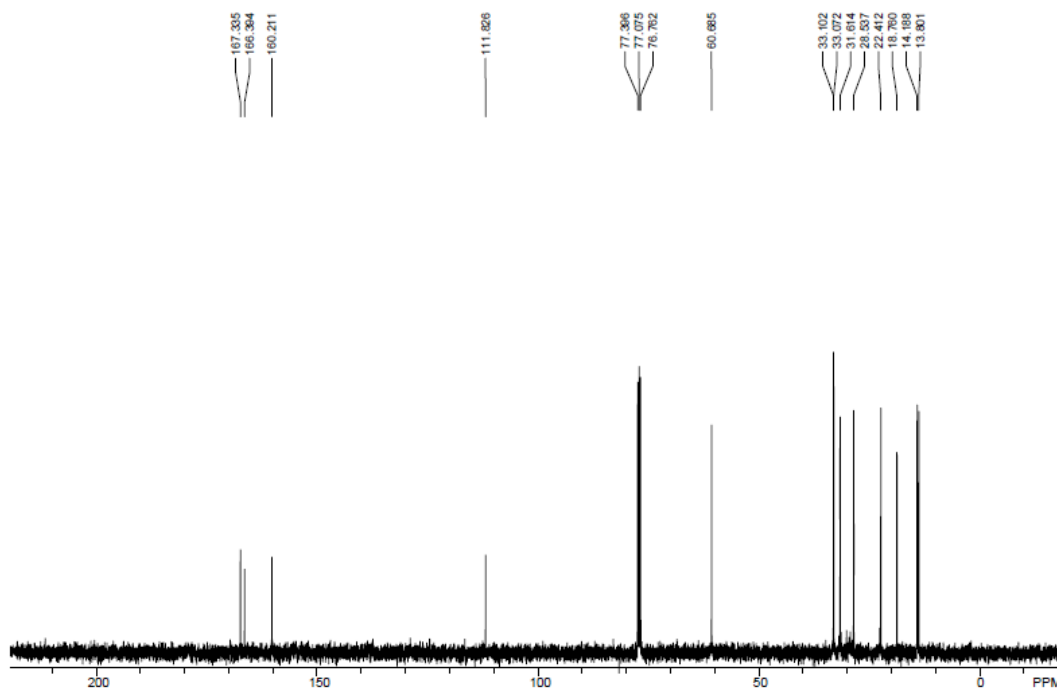



### $^1\text{H}$ NMR of **3n**

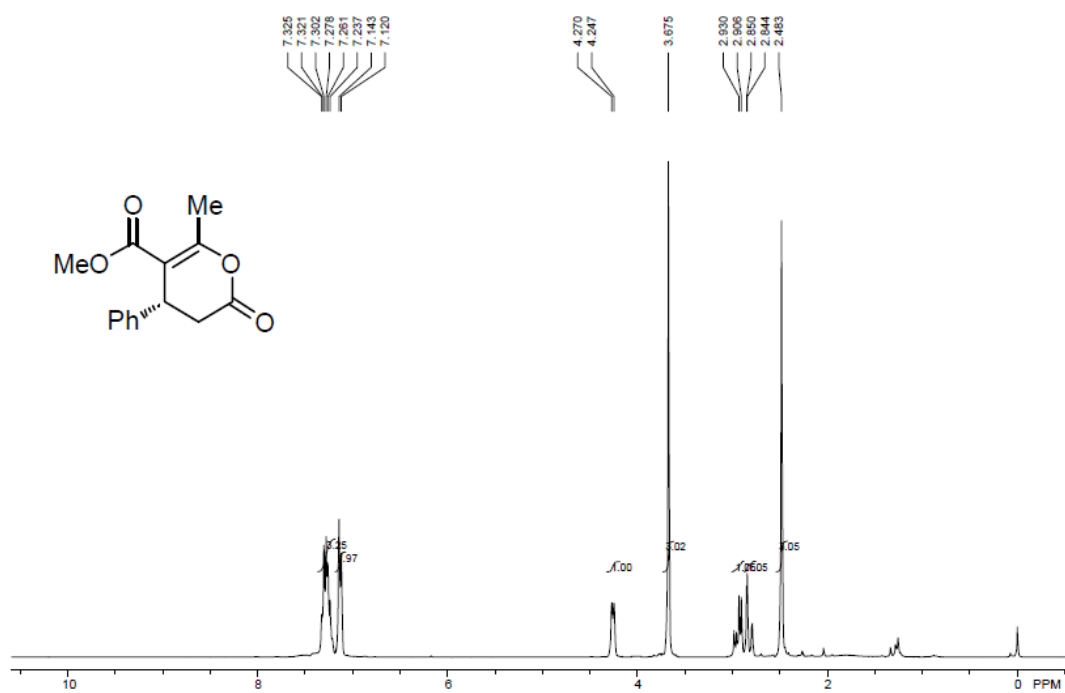

### $^1\text{H}$ NMR of **3o**

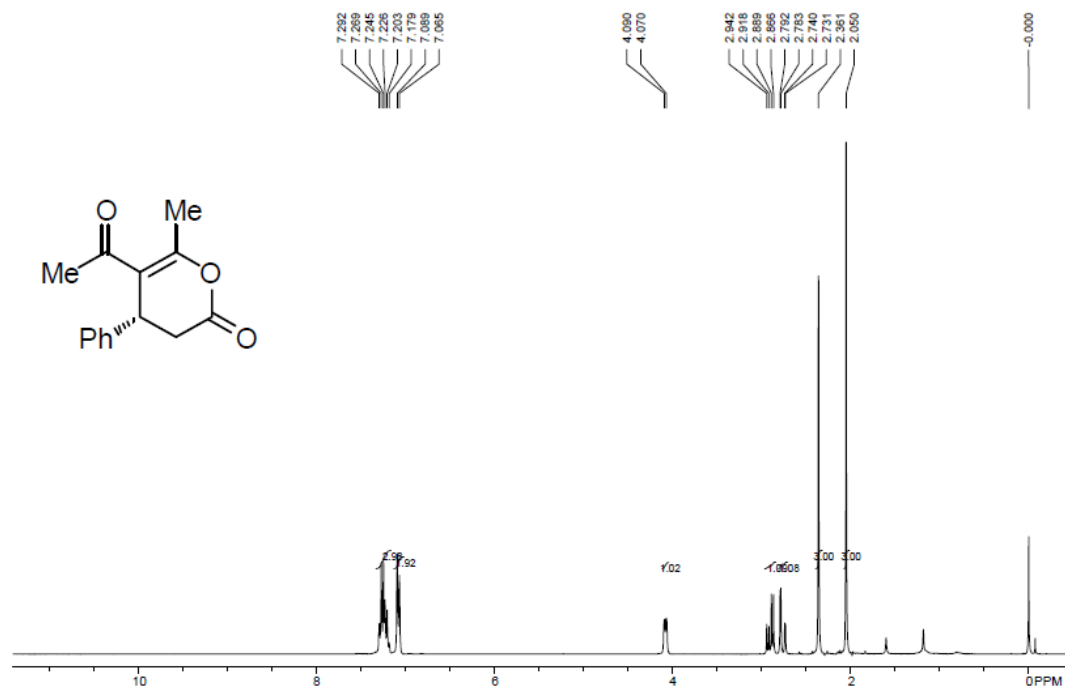

### $^1\text{H}$ NMR of **3p**

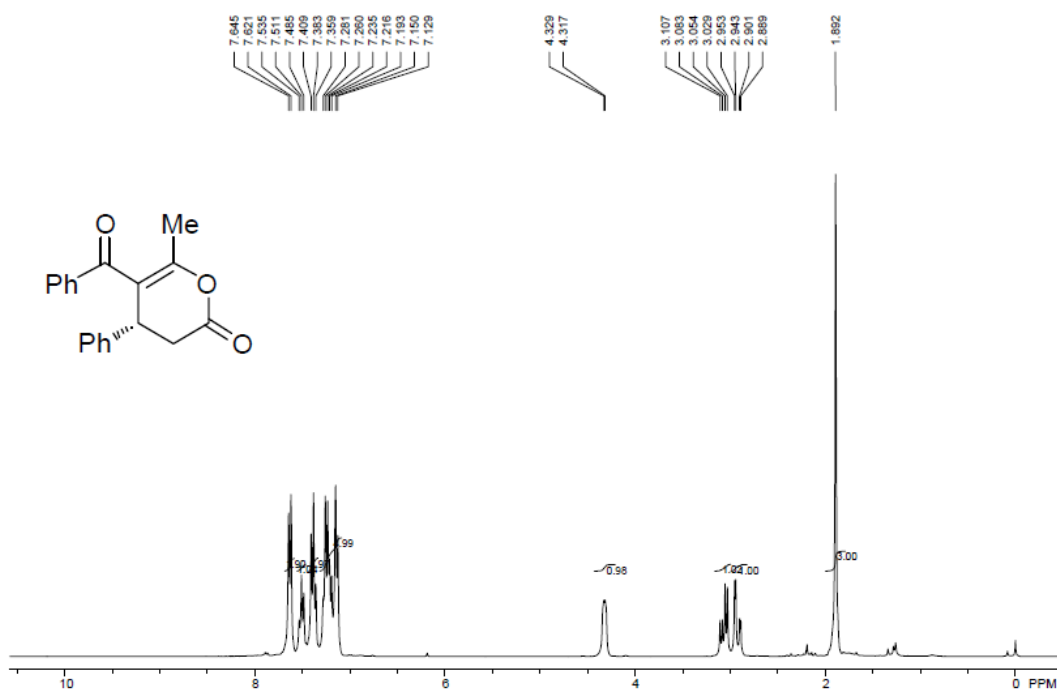

### $^1\text{H}$ NMR of **3q**

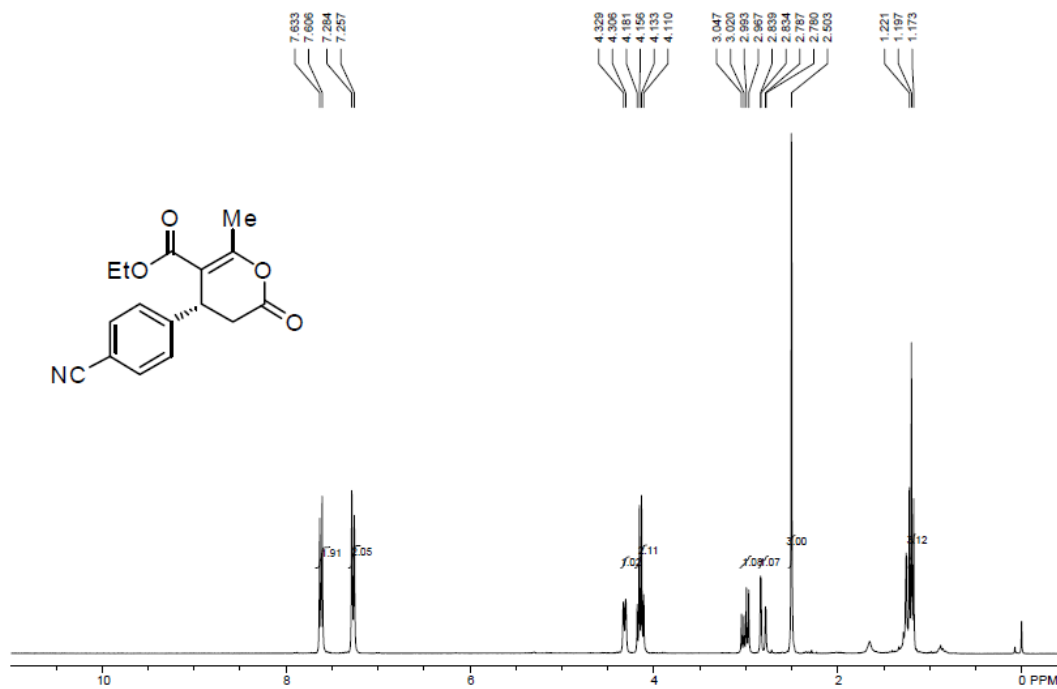

### $^{13}\text{C}$ NMR of **3q**

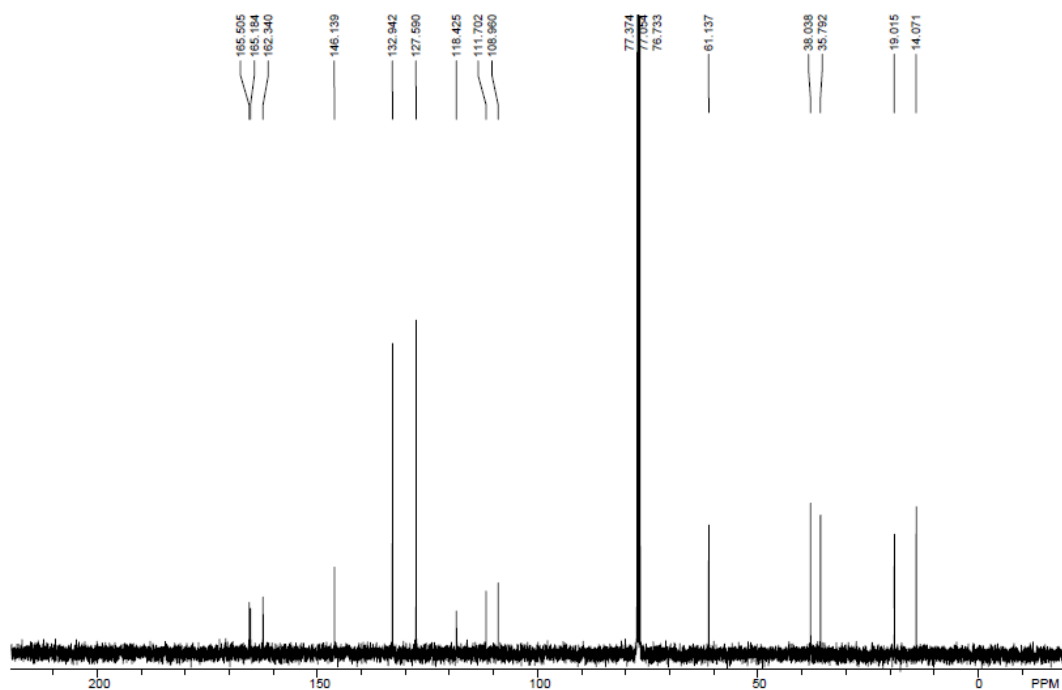

### $^1\text{H}$ NMR of **3r**

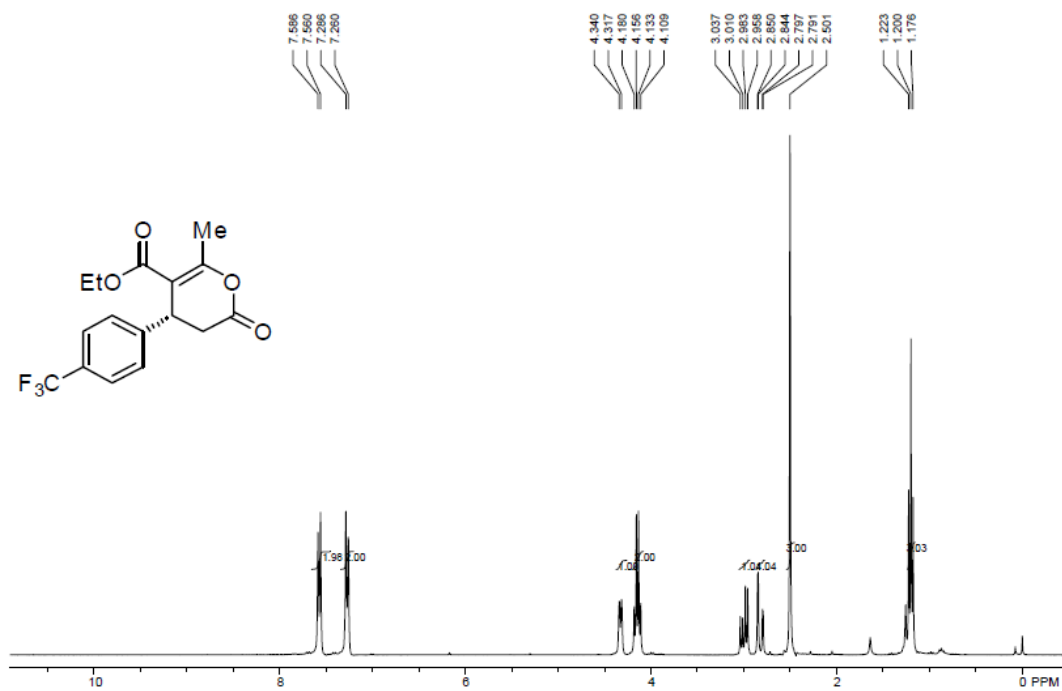

$^{19}\text{F}$  NMR of **3r**

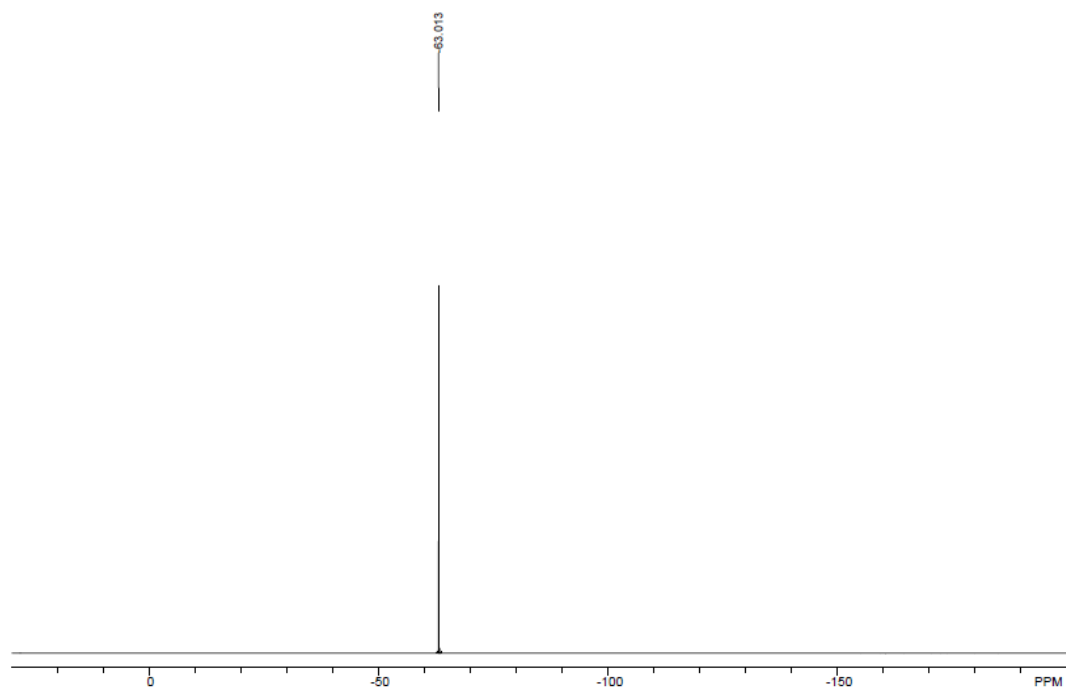

$^{13}\text{C}$  NMR of **3r**

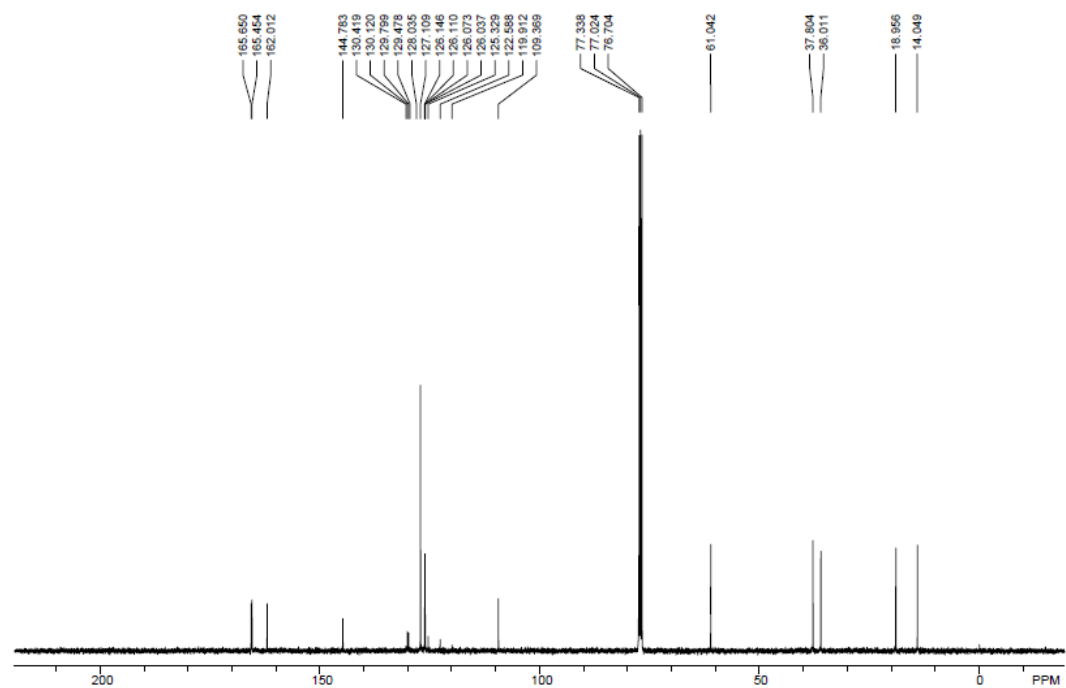



### $^1\text{H}$ NMR of **3s**

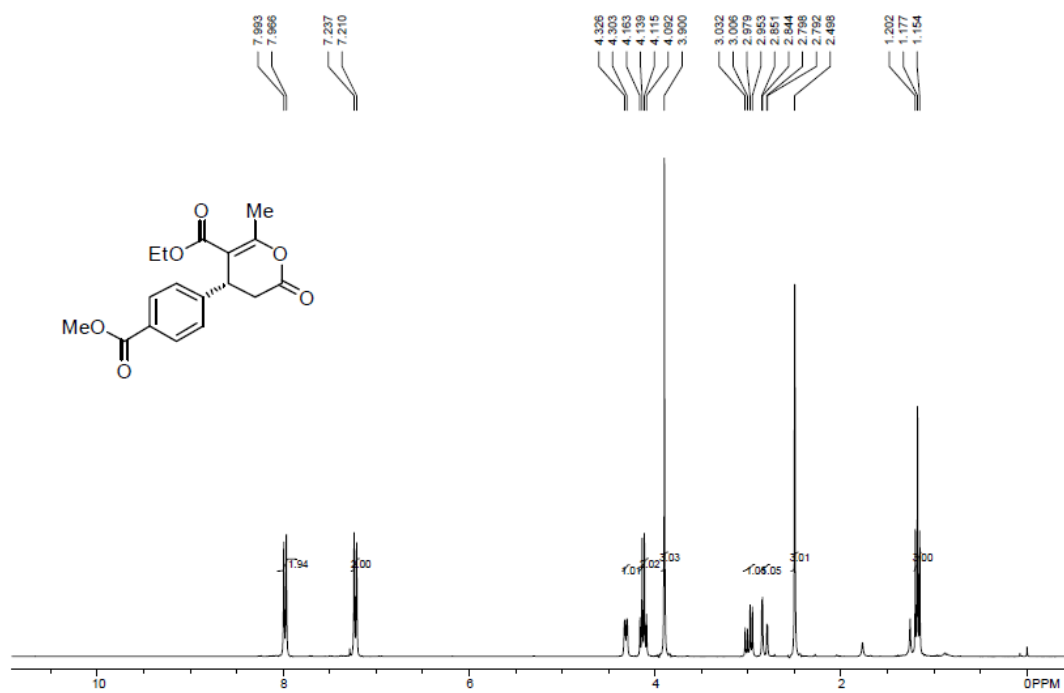

### $^{13}\text{C}$ NMR of **3s**

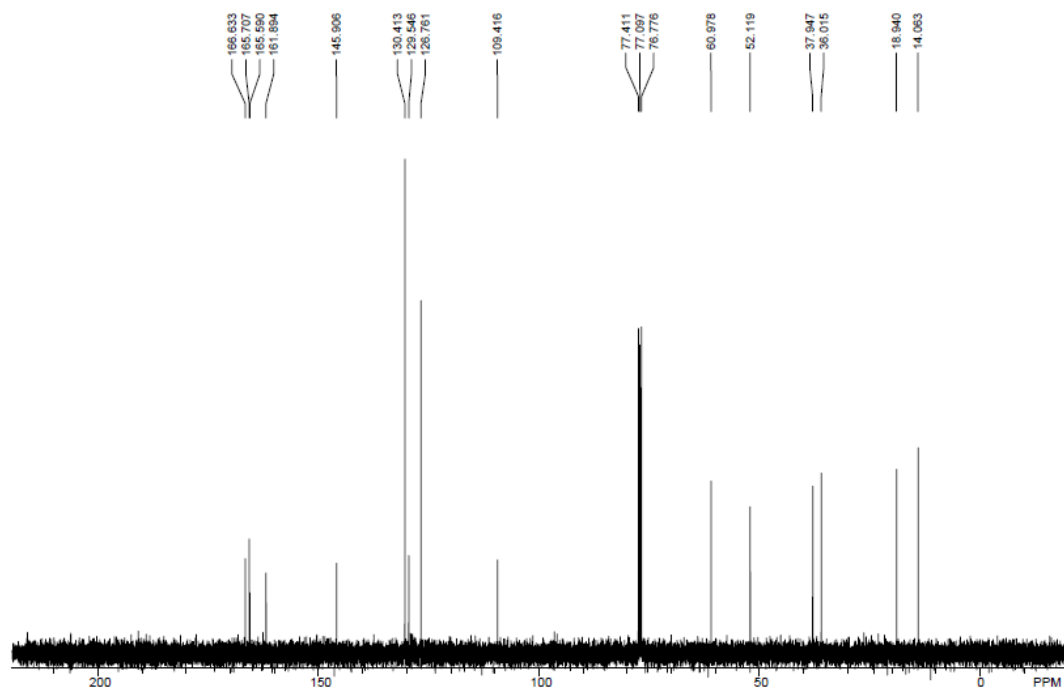

### $^1\text{H}$ NMR of **3t**

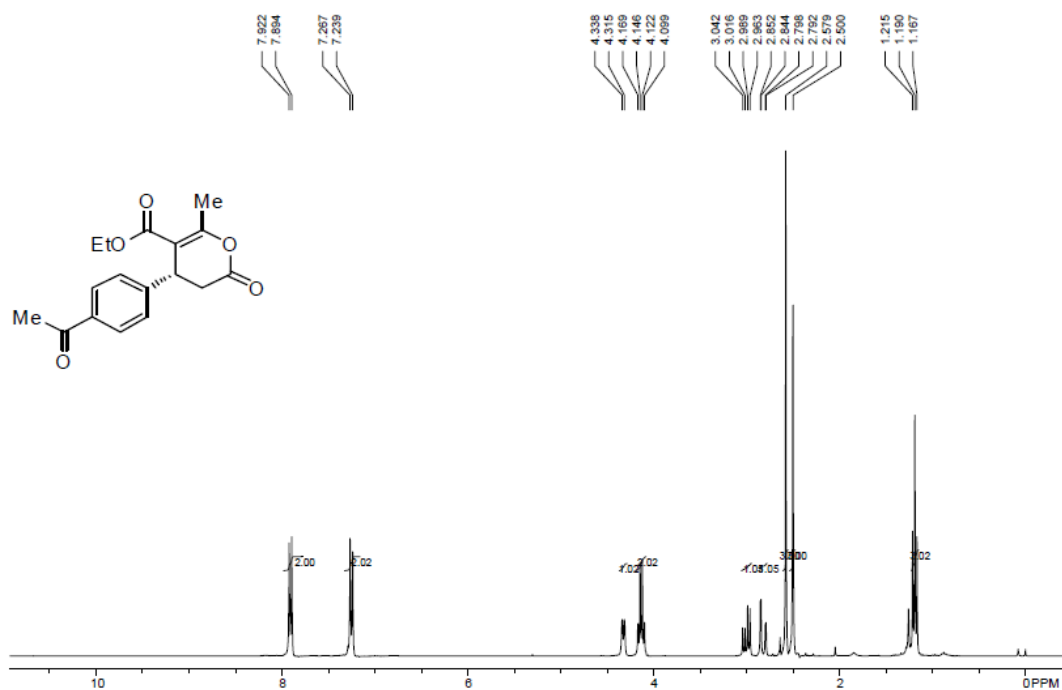

### $^{13}\text{C}$ NMR of **3t**

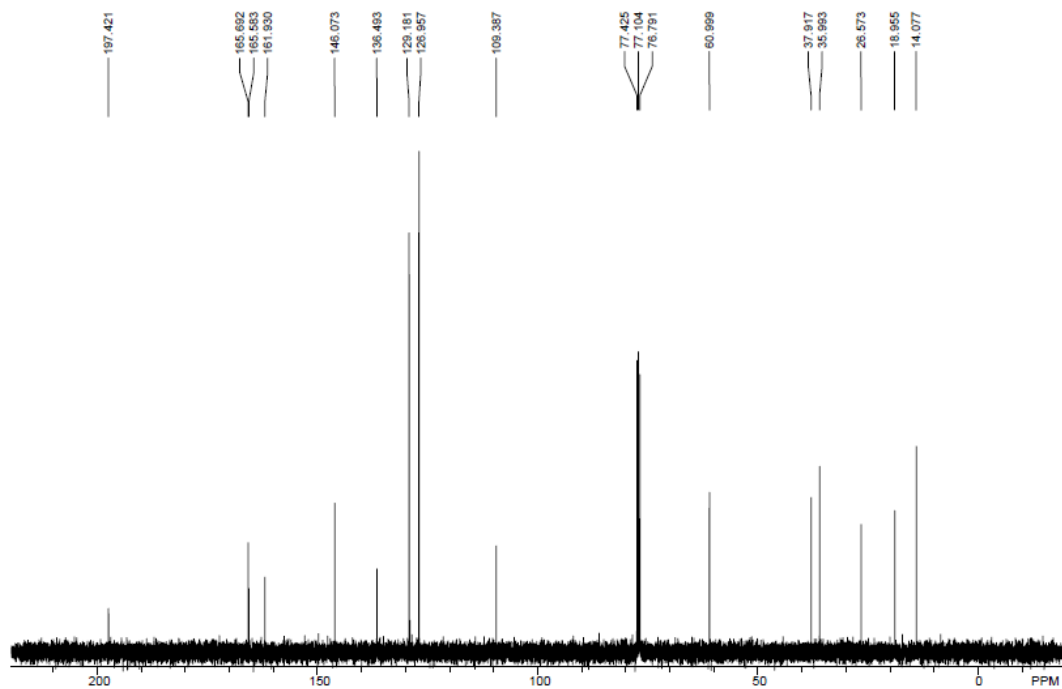

### $^1\text{H}$ NMR of **3u**

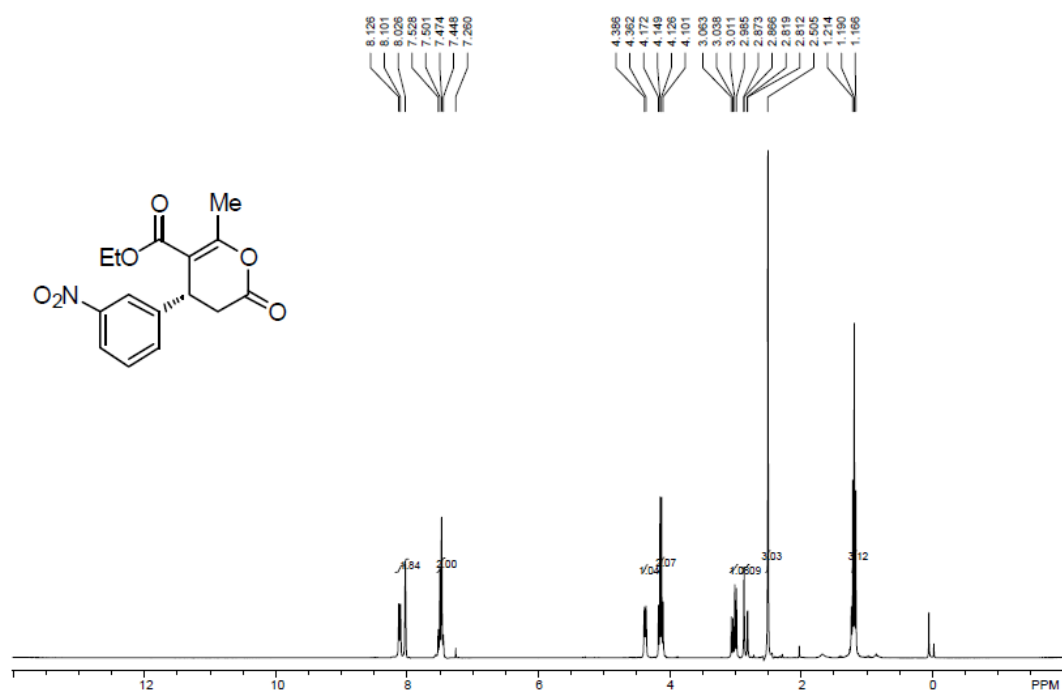

### $^{13}\text{C}$ NMR of **3u**

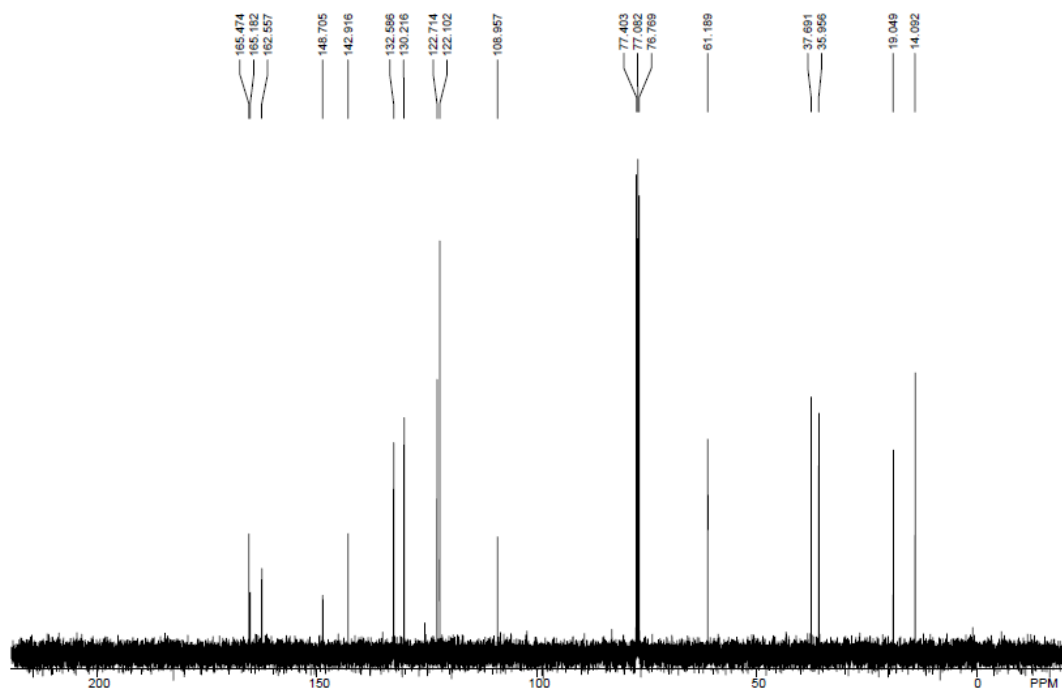

### $^1\text{H}$ NMR of **3v**

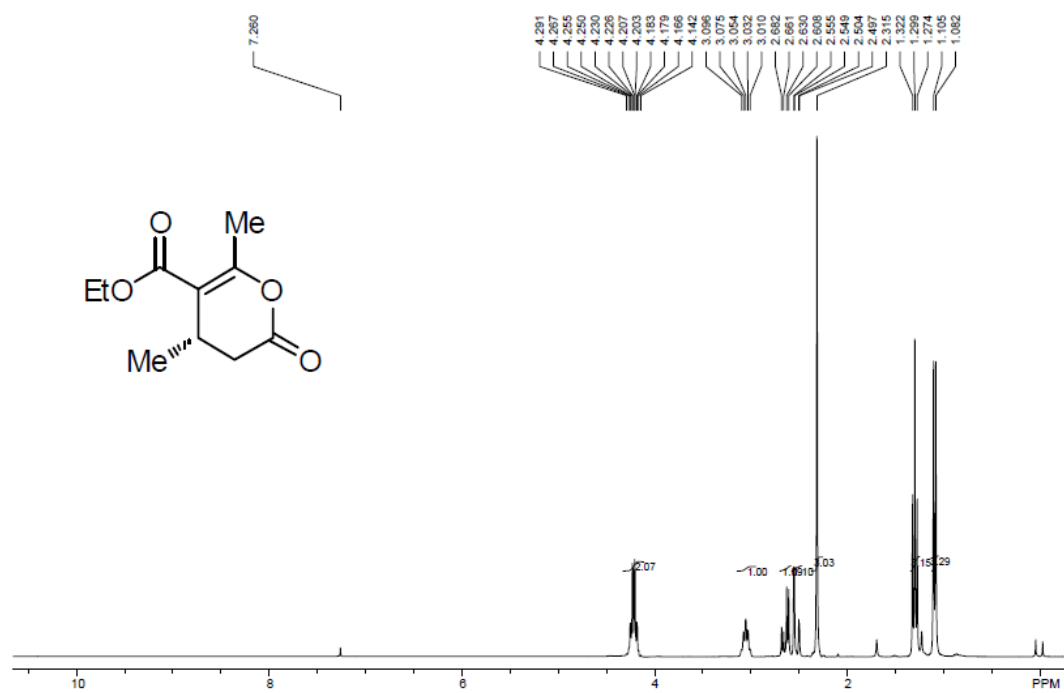

### $^{13}\text{C}$ NMR of **3v**

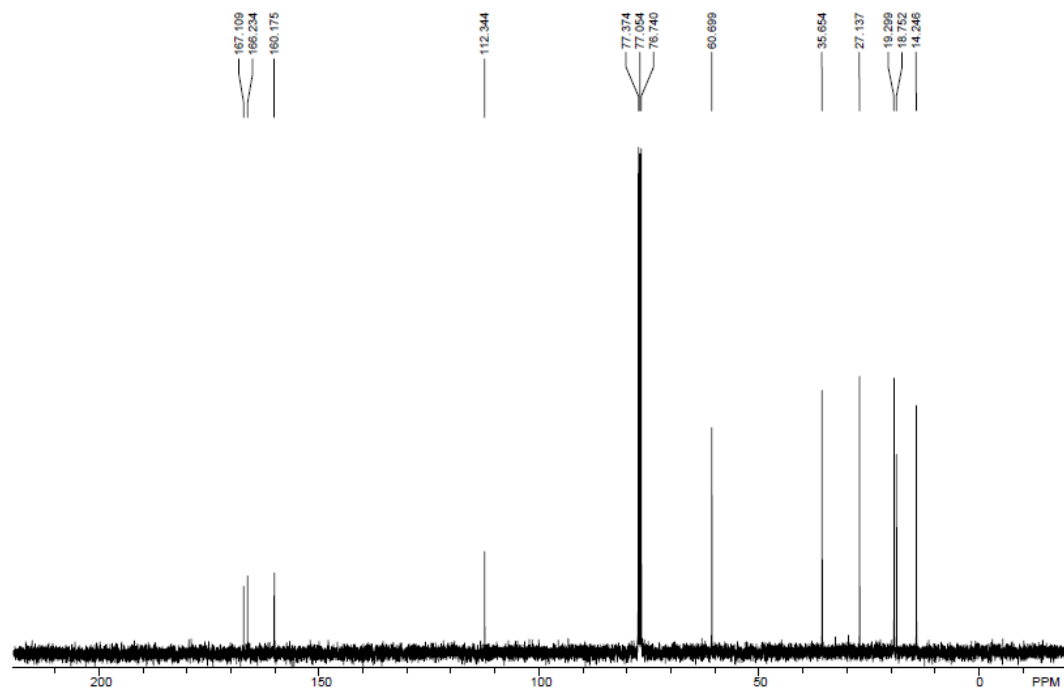

$^1\text{H}$  NMR of **3w**

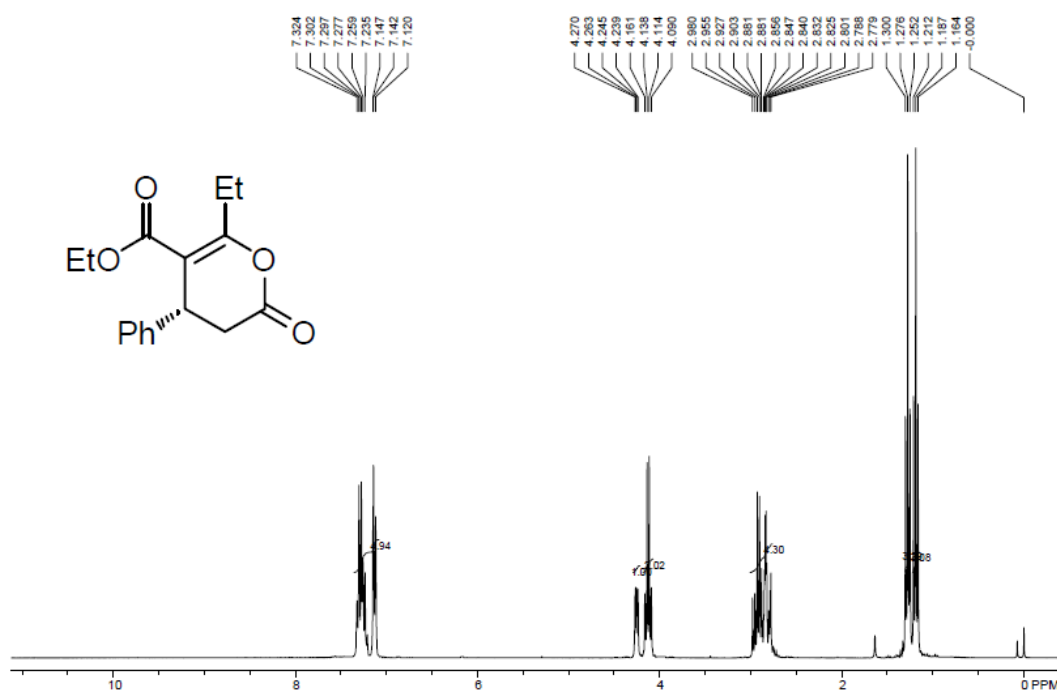

$^1\text{H}$  NMR of **3x**

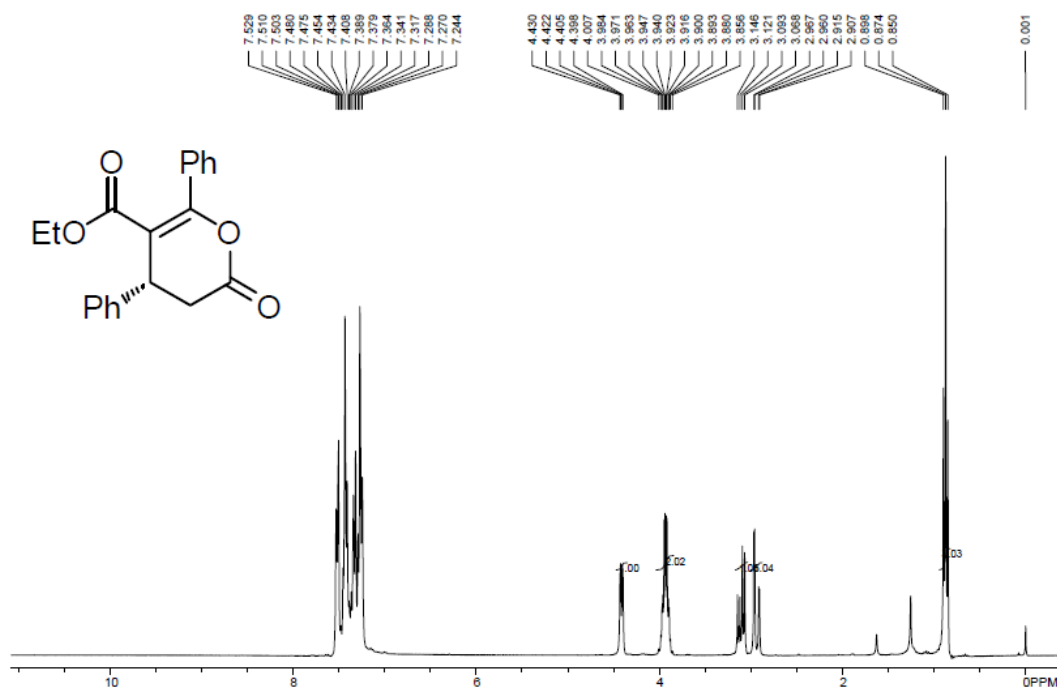

### $^{13}\text{C}$ NMR of **3x**

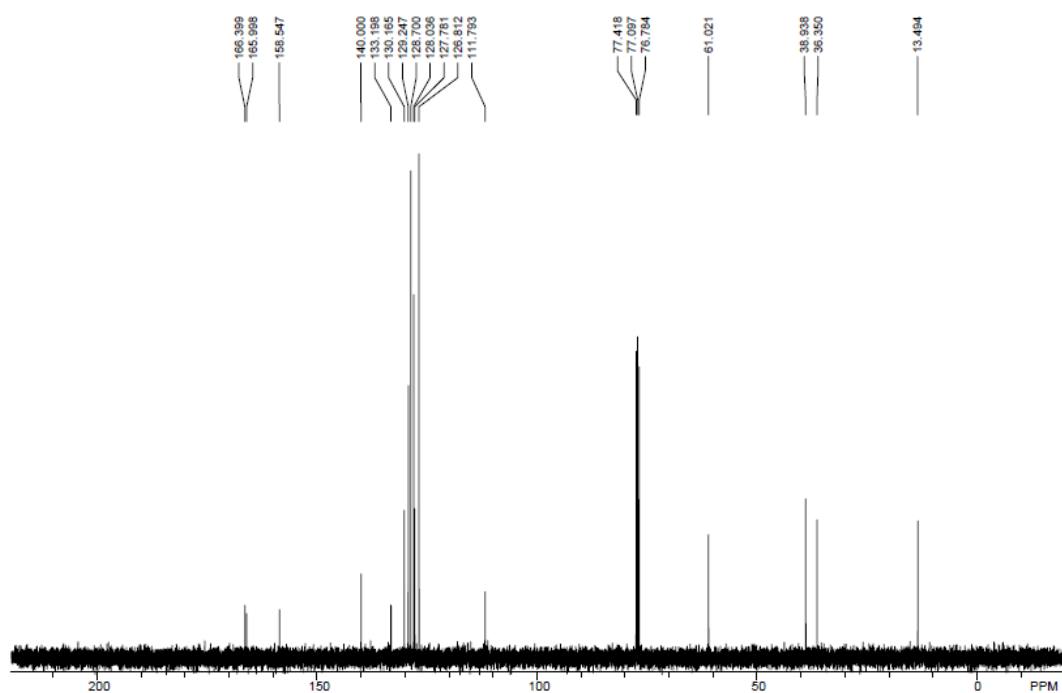

### $^1\text{H}$ NMR of **3y**

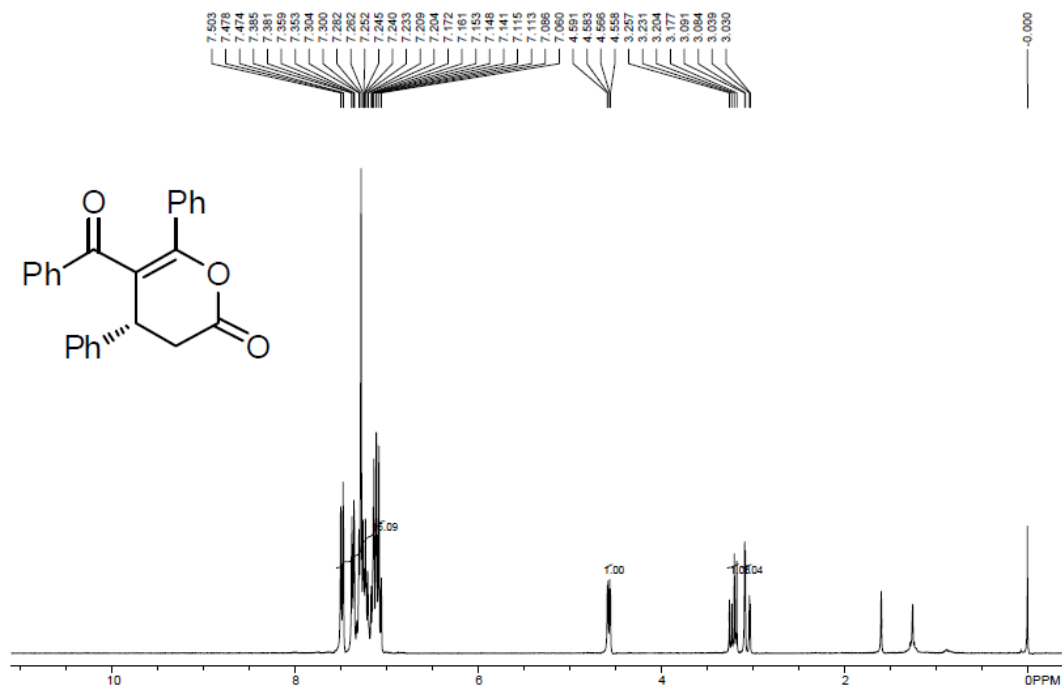

$^{13}\text{C}$  NMR of **3y**

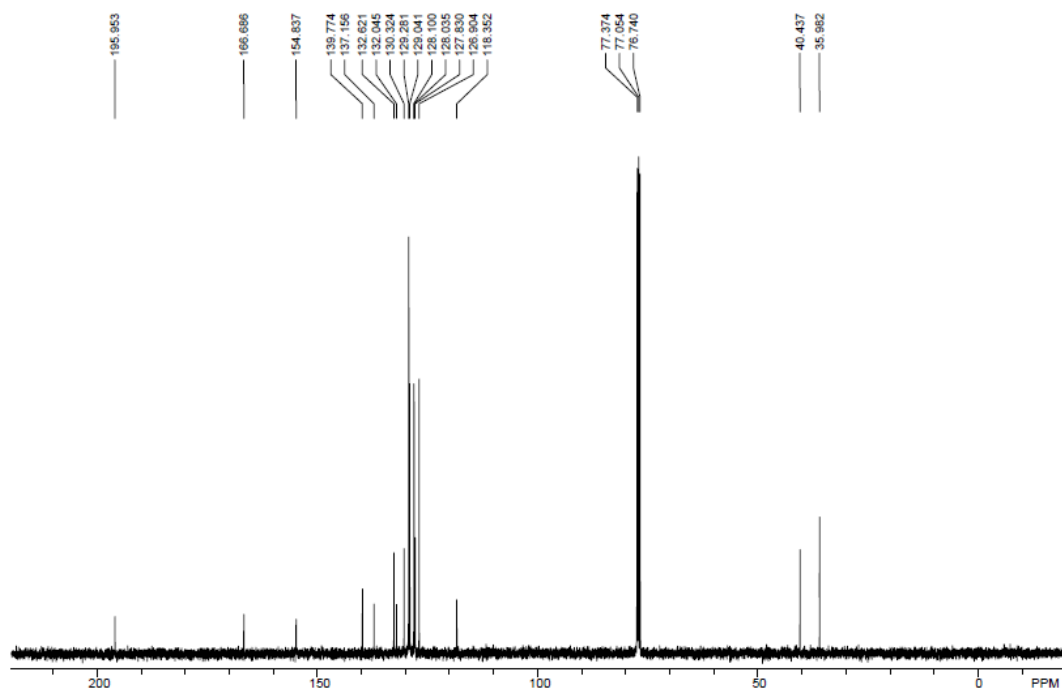

Supplement: c1cc12778k.pdf [file c1cc12778k.pdf]
